Cryo-EM structure of the benzodiazepine-sensitive  $\alpha 1\beta 1\gamma 2$  heterotrimeric GABA<sub>A</sub> receptor in complex with GABA illuminates mechanism of receptor assembly and agonist binding

Swastik Phulera\*<sup>1</sup>, Hongtao Zhu\*<sup>1</sup>, Jie Yu\*<sup>1</sup>, Derek P. Claxton<sup>1‡</sup>, Nate Yoder<sup>1</sup>, Craig Yoshioka<sup>1</sup> and Eric Gouaux<sup>1,2</sup>

<sup>1</sup>Vollum Institute, Oregon Health and Science University; <sup>2</sup>Howard Hughes Medical Institute, Oregon Health and Science University, 3181 SW Sam Jackson Park Road, Portland OR 97239

‡ Present address: Department of Molecular Physiology and Biophysics, Vanderbilt University, 741 Light Hall 2215 Garland Avenue, Nashville TN 37232

\*These authors contributed equally

Correspondence to Eric Gouaux: [gouauxe@ohsu.edu](mailto:gouauxe@ohsu.edu)

## ABSTRACT

Fast inhibitory neurotransmission in the mammalian nervous system is largely mediated by GABA<sub>A</sub> receptors, chloride-selective members of the superfamily of pentameric Cys-loop receptors. Native GABA<sub>A</sub> receptors are heteromeric assemblies sensitive to many important drugs, from sedatives to anesthetics and anticonvulsive agents, with mutant forms of GABA<sub>A</sub> receptors implicated in multiple neurological diseases, including epilepsy. Despite the profound importance of heteromeric GABA<sub>A</sub> receptors in neuroscience and medicine, they have proven recalcitrant to structure determination. Here we present the structure of the triheteromeric  $\alpha 1\beta 1\gamma 2_{EM}$  GABA<sub>A</sub> receptor in complex with GABA, determined by single particle cryo-EM at 3.1-3.8 Å resolution, elucidating the molecular principles of receptor assembly and agonist binding. Remarkable N-linked glycosylation on the  $\alpha 1$  subunit occludes the extracellular vestibule of the ion channel and is poised to modulate receptor assembly and perhaps ion channel gating. Our work provides a pathway to structural studies of heteromeric GABA<sub>A</sub> receptors and a framework for the rational design of novel therapeutic agents.

## INTRODUCTION

GABA<sub>A</sub> receptors are chloride permeable,  $\gamma$ -amino butyric acid (GABA)-gated ion channels that are responsible for the majority of fast inhibitory neurotransmission in the mammalian nervous system (Sigel and Steinmann, 2012b). Because of the fundamental role that GABA<sub>A</sub> receptors play in balancing excitatory signaling, GABA<sub>A</sub> receptors are central to the development and normal function of the central nervous system (Wu and Sun, 2015). In accord with their crucial role in brain function, mutations in GABA<sub>A</sub> receptor genes are directly linked to epilepsy syndromes (Hirose, 2014) and are associated with schizophrenia, autism, alcohol dependence, manic depression and eating disorder syndromes (Rudolph and Mohler, 2014). Moreover, GABA<sub>A</sub> receptors are the targets of a large number of important therapeutic drugs, from sedatives, sleep aids and anticonvulsive medications to anesthetic agents (Braat and Kooy, 2015). GABA<sub>A</sub> receptors are also the target of alcohol and are implicated in alcohol dependence (Trudell et al., 2014).

GABA<sub>A</sub> receptors belong to the pentameric ligand-gated ion channel (pLGIC) superfamily (Thompson et al., 2010). Other members of this family are nicotinic acetylcholine, 5-HT<sub>3A</sub>, GABA<sub>A</sub>, glycine, and the invertebrate GluCl and Zn<sup>2+</sup>-activated cation channels (Thompson et al., 2010). Members of the pLGIC are composed of five protein subunits and each subunit contains four transmembrane domains (M1–M4) along with extracellular N- and C- termini. GABA<sub>A</sub> receptors are typically found as heteromeric channels derived from a pool of 19 possible subunits:  $\alpha$ 1-6,  $\beta$ 1-3,  $\gamma$ 1-3,  $\delta$ ,  $\epsilon$ ,  $\theta$ ,  $\pi$ , and  $\rho$ 1-3 (Sigel and Steinmann, 2012). The large number of subunits gives rise to many possible pentameric assemblies; nevertheless, the most prevalent subunit combination in the

vertebrate brain is the triheteromeric receptor composed of two  $\alpha$ , two  $\beta$  and one  $\gamma$  subunit (Chang et al., 1996; Farrar et al., 1999; Tretter et al., 1997) with the arrangement of subunits being  $\beta$ - $\alpha$ - $\beta$ - $\gamma$ - $\alpha$ , clockwise when viewed from the extracellular space (Baumann et al., 2002; Baumann et al., 2001; Baur et al., 2006). The molecular basis for selective subunit assembly of GABA<sub>A</sub> receptors is not well understood.

Pioneering structural studies of the paradigmatic acetylcholine receptor (AChR) (Unwin, 2005), as well as crystallographic studies of homomeric pLGICs that include prokaryotic pLGICs (Hilf and Dutzler, 2008; Sauguet et al., 2013) and the eukaryotic GluCl (Hibbs and Gouaux, 2011), 5-HT<sub>3A</sub> serotonin receptor (Hassaine et al., 2014),  $\beta$ 3 GABA<sub>A</sub> (Miller and Aricescu, 2014),  $\alpha$ 3 glycine receptor (GlyR) (Huang et al., 2015), along with the cryo-EM structures of the zebrafish  $\alpha$ 1 GlyR (Du et al., 2015) and the mouse 5-HT<sub>3A</sub> receptor (Basak et al., 2018), have helped to shape our understanding of receptor architecture and mechanism. Recent structures of diheteromeric nAChRs also further our understanding of subunit arrangement and function in heteromeric Cys-loop receptors (Walsh et al., 2018).

These studies, together with a large number of biochemical and biophysical experiments, have defined the transmembrane ion channel pore, its lining by the M2 helices and likely mechanisms of ion selectivity (Cymes and Grosman, 2016; Sine et al., 2010). The extracellular N-terminal domain harbors the orthosteric agonist binding site, located at a subunit interfaces, in addition to multiple binding sites for an array of small molecules and ions that act as allosteric modulators (Lynagh and Pless, 2014). While the mechanism by which orthosteric agonists and competitive antagonists activate or inhibit ion channel activity is well explored (Gielen and Corringer, 2018), the molecular

mechanisms for the action of allosteric ligands, especially those that act on heteromeric GABA<sub>A</sub> receptors, remain to be fully elucidated. Here we present methods for the expression and isolation of triheteromeric GABA<sub>A</sub> receptors and the cryo-EM structure of the rat  $\alpha 1\beta 1\gamma 2_{EM}$  GABA<sub>A</sub> receptor in the presence of GABA. The structural analysis not only defines subunit assembly, but uncovers the mode of GABA binding to the orthosteric agonist binding site and suggests a critical role of *N*-linked glycosylation of the  $\alpha 1$  subunit in governing receptor assembly and, perhaps, in ion channel activity.

### **Receptor expression and structure elucidation**

To enhance receptor expression we employed the M3/M4 loop deletion constructs of the  $\alpha 1$  and  $\beta 1$  subunits analogous to the functional M3/M4 loop deletion constructs of GluCl (Hibbs and Gouaux, 2011) and GlyR (Du et al., 2015), together with a full-length construct of the  $\gamma 2$  subunit (Supplementary Figure 1), yielding the  $\alpha 1\beta 1\gamma 2_{EM}$  construct. Optimization of receptor expression constructs and conditions were monitored by fluorescence-detection size-exclusion chromatography (FSEC) (Kawate and Gouaux, 2006). We included a 1D4 affinity tag (MacKenzie et al., 1984) on the  $\gamma 2$  subunit to selectively isolate sufficient quantities of the heteromeric complex from baculovirus-transduced mammalian cells (Goehring et al., 2014). For the ensuing cryo-EM studies, we developed an  $\alpha 1$  subunit-specific monoclonal antibody, 8E3, with the aim of using the Fab fragment to identify the  $\alpha 1$  subunit in the pseudo-symmetric receptor complex (Supplementary Figure 2). The resulting purified  $\alpha 1\beta 1\gamma 2_{EM}$  receptor, in the presence of the 8E3 Fab, binds muscimol, a high affinity agonist, and flunitrazepam, a benzodiazepine, with affinities similar to the full-length receptor (Supplementary Figure 3) (Hauser et al., 1997; Johnston, 2014). Moreover, the  $\alpha 1\beta 1\gamma 2_{EM}$  receptor also exhibits ion

channel gating properties that are similar to the wild-type receptor in the presence and in the absence of the 8E3 Fab (Supplementary Figure 3) (Li et al., 2013). We note, however, that while the cryo-EM construct retains potentiation by diazepam, the extent of potentiation is reduced for the Fab complex.

Structure elucidation was carried out using the  $\alpha 1\beta 1\gamma 2_{EM}$  receptor solubilized in dodecylmaltoside and cholesterol hemisuccinate (CHS) in the presence of 1.5 mM GABA. To enhance particle density on the cryo-EM grids despite modest levels of receptor expression, we employed grids coated with graphene oxide. We proceeded to collect micrographs using a Titan Krios microscope and a Falcon 3 camera as described in the Materials and Methods. Subsequent selection of particles and calculation of 2D class averages yielded projections that were readily identified as a pentameric Cys-loop receptor bound by 2 Fab fragments (Figure 1 and Supplementary Figure 4). Three dimensional reconstruction, proceeded by judicious masking of either the Fab constant domains or, alternatively, the receptor transmembrane domain (TMD), allowed for reconstructions at  $\sim 3.8$  Å and  $\sim 3.1$  Å resolution, respectively, based on Fourier Shell Correlation (FSC) analysis (Supplementary Figure 5 and Supplementary Table 1). We note that there is substantial preferred orientation in the particle distribution and, despite substantial efforts in exploring a wide spectrum of conditions, we were unable to obtain grids that yielded more well distributed particle orientations. Inspection of the resulting density maps were consistent with these resolution estimations, and in the case of the density in the extracellular domain (ECD), the quality of the density map is excellent, allowing for visualization of medium and large side chains, as well as glycosylation of Asn side chains (Supplementary Figure 6). By contrast, the density for the TMD is not as well

defined. While the M1, M2 and M3 helices of all subunits show strong density, with density for some residues with large side chains, the M4 helices of the two  $\alpha 1$  subunits and the  $\gamma$  subunit have weak density and thus we have not attempted to include them in the structure. To build a molecular structure into the cryo-EM density maps, we first generated homology models of the  $\alpha 1$ ,  $\beta 1$  and  $\gamma 2$  subunits using the human  $\beta 3$  GABA<sub>A</sub> receptor (PDB code: 4COF) (Miller and Aricescu, 2014) as a template and then manually fit the models to the density and carried out iterative cycles of manual fitting and computational refinement, which together resulted in a structural model that fits well to the density and that has good stereochemistry (Supplementary Table 1).

### **Heterotrimeric GABA<sub>A</sub> receptor subunit arrangement**

The  $\alpha 1\beta 1\gamma 2$ EM receptor hews to the classic architecture of Cys-loop receptors, first established by cryo-EM studies of the nicotinic receptor (Toyoshima and Unwin, 1988; Unwin, 1993; Unwin, 2005), with a clockwise subunit arrangement of  $\alpha 1$ - $\beta 1^*$ - $\gamma 2$ - $\alpha 1^*$ - $\beta 1$  when viewed from the extracellular side of the membrane. Here we label the  $\alpha 1^*$  and  $\beta 1^*$  subunits that are adjacent to the unique  $\gamma 2$  subunit with asterisks in order to distinguish them from their chemically equivalent yet spatially distinct  $\alpha 1$  and  $\beta 1$  partners. The arrangement of subunits in this heteromeric complex, as mapped out by the  $\alpha 1$ -specific Fab fragments, is in agreement with previous biochemical studies (Supplementary Figure 2) (Baur et al., 2006). The subunit identity is further verified by prominent N-linked glycosylation sites that are unique to each subunit. The epitope of the Fab fragment resides entirely on the periphery of the  $\alpha 1$  ECDs and the Fab buries approximately 760 Å<sup>2</sup> of surface area in the interface with the receptor. Most of the receptor residues that interact with the Fab are located on the  $\beta 8$ ,  $\beta 9$  and  $\beta 10$  elements of secondary structure

(Supplementary Figure 7,8). While the Fab binding site is near the crucial C-loop, we note that it does not overlap with it and thus the Fab is unlikely to directly influence agonist binding, in agreement with the agonist binding experiments (Supplementary Figure 3).

### **Subunit interfaces**

Subunit-subunit interactions within the extracellular domain play a major role in pLGIC function (Jones and Henderson, 2007) and in GABA<sub>A</sub> receptor assembly. Here, we estimate that within the ECD there is an interaction area of 1150-1600 Å<sup>2</sup> between each subunit (Supplementary Table 2). There are five unique subunit interfaces in the tri-heteromeric receptor and, while we observed a similar arrangement of the ECDs at each interface, we also found subtle differences due to variations in amino acid sequences and in local protein structure. When comparing the various subunit interfaces one can readily identify specific interactions of amino acids that are common to all interfaces (Figure 2). As examples, at the  $\alpha(+)/\beta(-)$  interface (Figure 2B), there is a conserved interaction between Tyr209 at the beginning of  $\beta$ 10 from the  $\alpha$  subunit at the (+) face to Arg117 at  $\beta$ 5 in (-) face, as well as a hydrogen bond between Tyr206 from the  $\alpha$  subunit and Gln64 from the  $\beta$  subunit. At the  $\beta(+)/\alpha^*(-)$  interface (Figure 2C), a similar interaction is observed between Tyr205 at the beginning of  $\beta$ 10 from the  $\beta$  subunit of the (+) subunit and Arg117 at  $\beta$ 5 in the (-) subunit. Furthermore, a hydrogen bond between Thr202 from the  $\beta$  subunit and Arg66 from the  $\beta$  subunit is observed even though, in comparison to the  $\alpha(+)/\beta(-)$  interface, the Gln is replaced by Arg. At the  $\alpha^*(+)/\gamma(-)$  interface (Figure 2D), the distance between Tyr209 from the  $\alpha$  and Arg132 from the  $\gamma$  subunit is similar to that observed at the  $\alpha(+)/\beta(-)$  interface. The hydrogen bond observed in  $\alpha(+)/\beta(-)$ ,  $\beta(+)/\alpha^*(-)$ ,  $\beta^*(+)/\alpha(-)$  (Figure 2 B,C and F) between a Thr from the (+) face and Arg/Gln at the (-) face is lost



because Ala79 occupies the position corresponding to the Arg/Gln residues. At the  $\gamma(+)/\beta^*(-)$  interface, Tyr220 from the  $\gamma$  subunit is within hydrogen bonding distance to Arg117 from the  $\beta$  subunit. Interestingly, with the other set of interactions seen in the  $\alpha(+)/\beta(-)$ ,  $\beta(+)/\alpha^*(-)$  and  $\beta^*(+)/\alpha(-)$  interfaces (Figure 2 B,C and F) between a Thr from the (+) face and a Arg/Gln at the (-) face, the Thr is replaced by a Ser and forms a hydrogen bond with the Tyr220 from the  $\gamma$  subunit rather than interacting with the Gln64 from the  $\beta$  subunit. The  $\beta^*(-)/\alpha(-)$  interface closely resembles the spatially distinct  $\beta(+)/\alpha^*(-)$  interface (Figure 2 F, C), with both of the interactions preserved.

To investigate the overall conformation of the extracellular domain, we compared the ECDs of our current structure and their relative positioning to the existing structures of homomeric pLGICs. To do this, we superposed the  $\alpha$  subunit of our structure onto one of the subunits of the homomeric 5-HT<sub>3A</sub> receptor in the apo (Basak et al., 2018) or the desensitized state (Hassaine et al., 2014), the human GABA<sub>A</sub> receptor bound to benzamidine (Miller and Aricescu, 2014) and homomeric GlyR bound to strychnine or to glycine/ivermectin (Du et al., 2015) (Supplementary Figure 9).

We observe that the ECDs in all the homomeric structures are located at similar distances as in our current structure. Nevertheless, if we compare the pentagon formed by joining a line through the center of mass of these individual ECDs, we observe that these are rotated in comparison to our current structure and that our current structure most resembles the conformation of glycine/ivermectin-bound GlyR. Thus, we propose that the conformation of the ECD represents an agonist/allosteric modulator bound, activated-like state.

## Neurotransmitter binding sites

To illuminate the molecular basis for GABA binding, we determined the structure of the  $\alpha 1\beta 1\gamma 2_{EM}$  receptor in the presence of saturating GABA (Sigel and Steinmann, 2012). Neurotransmitter binding sites in Cys-loop receptors are located at the interface of two adjacent subunits and are composed of the three loops from the principle (+) face and  $\beta$ -strands from the complementary (-) face (Nys et al., 2013). There are three substantive densities within the neurotransmitter binding sites, at the interface between the  $\beta^*(+)/\alpha(-)$ , the  $\alpha(+)/\beta(-)$  and the  $\beta(+)/\alpha^*(-)$  subunits, an observation that diverges from previous studies suggesting that there are only two canonical GABA binding sites and that they are located at the  $\beta^*(+)/\alpha(-)$  and  $\beta(+)/\alpha^*(-)$  interfaces (Figure 3A and Supplementary Figure 10) (Chua and Chebib, 2017). Nevertheless, other studies have pointed out that GABA may bind to interfacial binding sites in addition to the two canonical sites (Chua and Chebib, 2017). The oval-like densities in the two canonical sites are well fit by the chemical structure of GABA, although the density feature at the  $\beta(+)/\alpha^*(-)$  interface is weaker than that at the  $\beta^*(+)/\alpha(-)$  site (Supplementary Figure 10). Interestingly, the third feature at the  $\alpha(+)/\beta(-)$  interface, with a sausage-like shape, has the strongest density (Supplementary Figure 10). Because GABA is the only small molecule present in the sample buffer that has a size and shape similar to the density feature, we speculate that the density belongs to a GABA molecule. Nevertheless, it is possible that an unidentified small molecule copurified with the receptor. Further studies will be required to experimentally determine GABA binding stoichiometry, and higher resolution cryo-EM studies will be needed to more thoroughly define the density features.

In the canonical binding sites, GABA is wedged between the  $\beta^*(+)$  and  $\alpha(-)$  subunits with extensive interactions with residues from loop C, loop B, loop A,  $\beta 2$  strand and  $\beta 6$  strand. The amino group of GABA forms hydrogen bonds with the backbone carbonyl oxygen of Tyr157 (loop B), Glu155 (loop B) and Tyr 97 (loop A) and a cation- $\pi$  interaction with Tyr205, while the carboxylate group forms possible hydrogen bonds with Thr129 ( $\beta 6$  strand) and Thr202 (loop C) and a salt bridge with Arg66 ( $\beta 2$  strand). In addition, sandwiching of the amino group of GABA between Tyr205 (loop C) and Tyr157 further increases the number of interactions between agonist and receptor (Figure 3B). Notably, Tyr97, Glu155 and Arg66 are unique in the  $\beta$  subunit compared to the corresponding residues in the  $\alpha$  and  $\gamma$  subunits and are crucial for substrate binding, as reported in previous studies demonstrating that Tyr97 and Arg66 play an important role in the binding pocket (Newell et al., 2004; Sander et al., 2011; Smith and Olsen, 1995). Mutation of Tyr157, a highly conserved residue in the  $\alpha$ ,  $\beta$  and  $\gamma$  subunits, significantly reduces the binding affinity for agonist and antagonist (Lummis, 2009). Similar neurotransmitter binding interactions have previously been reported in the other Cys-loop members, including GluCl and GlyR (Du et al., 2015; Hibbs and Gouaux, 2011). Superimposing this canonical binding site with the putative third “GABA” binding site at the interface of the  $\alpha(+)/\beta(-)$  site shows that there are fewer interactions between “GABA” and the surrounding residues, such as the cation- $\pi$  interactions with Tyr209 and contacts with Thr206 and the carbonyl oxygen of Tyr159 (Figure 3C). We thus emphasize that, while the density feature is unambiguous, the identification of this site as a bona fide GABA binding site will require additional investigation.

We also superimposed the canonical GABA binding site at the  $\beta^*(+)/\alpha(-)$  interface with the homologous sites at the  $\gamma(+)/\beta(-)$  and  $\alpha^*(+)/\gamma(-)$  interfaces, finding differences among the residues that play important roles in binding GABA, differences that may lead to weak or no GABA binding (Figure 3D and E). In inspecting these sites that include the  $\gamma$  subunit, we have attempted to better understand the binding site of benzodiazepines, such as diazepam, which function as allosteric potentiators of  $\gamma$ -subunit containing GABA<sub>A</sub> receptors (Supplementary Figure 3) (Li et al., 2013). Previous studies demonstrated that diazepam binds to the  $\alpha^*(+)/\gamma(-)$  interface with high affinity (Li et al., 2013). In agreement with previous studies, we speculate that  $\alpha^*$ His101 could provide a strong aromatic or hydrophobic interaction with the pendant phenyl ring of diazepam. Additionally,  $\alpha^*$ Tyr209,  $\alpha^*$ Phe99,  $\alpha^*$ Tyr159 and  $\gamma$ Phe77 likely contribute to the hydrophobic interactions with diazepam (Figure 3F). All these key structural residues surrounding the diazepam site have been identified in homology models and functional experiments (Richter et al., 2012; Teissere and Czajkowski, 2001; Wongsamitkul et al., 2017). Mutation of  $\alpha^*$ His101,  $\alpha^*$ Tyr209 and  $\alpha^*$ Tyr159 markedly impairs the modulation by diazepam (Amin et al., 1997), while mutation of  $\gamma$ Phe77 results in decreased binding affinity.

Agonist binding has been proposed to induce loop C closure in the open, ion conducting state and antagonist binding to stabilize an “open” configuration of loop C in the closed, non-conducting state of the ion channel (Du et al., 2015; Mukhtasimova et al., 2005; Purohit and Auerbach, 2013). To probe the relationship between agonist binding and the position of loop C, we superimposed the  $\beta^*$  subunit with GABA bound onto the  $\alpha^*$  and  $\gamma$  subunits and found that loop C in the  $\beta^*$  subunit is in an “open” conformation relative to that in the  $\alpha^*$  and  $\gamma$  subunits (Supplementary Figure 11). Additionally,

superposition of the ECD of the  $\beta^*/\alpha$  subunit with the human  $\beta 3$  GABA<sub>A</sub>, GlyR-open and GlyR-closed structures suggests the position of loop C in the  $\beta^*$  subunit closely approximates that in the GlyR-closed non-conducting state, while loop C in the human  $\beta 3$  GABA<sub>A</sub> is in a more “open” configuration (Supplementary Figure 12). However, this interpretation is subject to caveats because it is derived from the comparison of different subunits and different receptors. It will be more persuasive to define the relationship between loop C and the functional state of the receptor using the same receptor in different ligand bound/functional states, as well as in the absence of bound Fab.

### **Glycosylation within the extracellular vestibule**

There is a well-defined glycosylation site at Asn110 of the  $\alpha$  subunit, within the extracellular vestibule of the receptor, at a site of post-translational modification that is distinct from the other GABA<sub>A</sub> receptor subunits (Figure 4A) and not observed before in any Cys-loop receptor (Supplementary Figure 8, 13). This site is predicted to be glycosylated based on sequence analysis (Blom et al., 2004; Julenius et al., 2005; Miller and Aricescu, 2014), and the quality of the cryo-EM map allows us to confidently locate sugar residues involved in glycosylation (Figure 4B and C). For the  $\alpha$  subunit at Asn110 we have built a carbohydrate chain with 7 sugar residues and for the  $\alpha^*$  subunit at Asn 110 we have built a carbohydrate chain with 4 sugar groups (Figure 4B and C). These two carbohydrate chains are remarkably well ordered, a feature that is likely due to the fact that the chains are contained within the extracellular vestibule and are in direct contact with numerous protein side chains (Figure 4A and 5). Additional glycosylation sites found in the  $\beta$  subunit have been previously observed in the  $\beta 3$  crystal structure

(Miller and Aricescu, 2014) and are located on the external surface of the receptor, pointing away from the receptor (Figure 4B).

The glycosylation at the  $\alpha$  subunit is well supported by the density to the extent that even chain branches can be easily defined (Figure 4C and D). These glycosylation sites are located in the ECD at the center of the pore (Figure 4B and 5) and they occupy a substantial portion of the ECD cavity. The volume of glycosylation in the vestibule is approximately  $700 \text{ \AA}^3$  at the contour level of  $6 \sigma$ , which occupies nearly 18% of the total volume of the ECD vestibule. Because it is likely that each carbohydrate chain has sugar residues that are not resolved in the density map, we predict that the volume of the ECD vestibule occupied by these carbohydrate groups is actually larger than our estimation. There are extensive and specific interactions observed between the sugar groups and the  $\gamma$  subunit involving residues Asn101, Lys112 and Trp123 (Figure 4A and 5).

We propose that the glycosylation at Asn110 of the  $\alpha$  subunits is important for subunit assembly, effectively blocking the formation of pentamers with more than two  $\alpha$  subunits, due to the fact that more than two carbohydrate chains would engage in sterically prohibitive van der Waals clashes. Moreover, we speculate that the contacts between the carbohydrate at position Asn110 of the  $\alpha$  subunit and, for example, the Trp123 of the  $\gamma$  subunit, favor the inclusion of the  $\gamma$  subunit as the last subunit in formation of the heteropentamer. This is consistent with prior studies which showed that glycosylation of the  $\alpha$  subunit is essential for proper receptor assembly in mammalian cells (Buller et al., 1994) and the important role of tryptophan residues in interacting with carbohydrates in general (Maenaka et al., 1994).

We further suggest that these carbohydrate chains within the extracellular vestibule may also modulate receptor gating and, perhaps, ion channel block by large ion channel blockers. Indeed, it is intriguing that a post-translational modification such as N-linked glycosylation occupies such an important and 'internal' site in a neurotransmitter-gated ion channel.

### **Conformation and asymmetry of the TMD**

In the GABA<sub>A</sub> structure the intrinsic flexibility of the TMD or the presence of the detergent micelle prevents us from accurately placing residues in each TM helix, especially in the M4 helices. Nevertheless, the density of the M1, M2 and M3 helices is well defined, allowing us to reliably position the helices. We note that in this receptor composed of  $\alpha$ ,  $\beta$  and  $\gamma$  subunits there is a breakdown in 5-fold symmetry observed in the homomeric or diheteromeric Cys-loop receptors (Figure 6) (Miller and Aricescu, 2014; Nys et al., 2013). While the distances between the center of mass (COM) of two adjacent subunits are similar, where the COMs were calculated using the M1, M2 and M3 helices of each subunit, varying from 17.6 Å to 19 Å, the angles in the pentagon range from 94° to 124° (Figure 6A). Looking at the top-down views of five central M2 helices, the two  $\alpha$  M2 helices are located away from the other three TM helices. Superimposition of the two  $\beta$  subunits with the human  $\beta 3$  GABA<sub>A</sub> receptor shows that there are rotations of each TM helix in the  $\alpha 1\beta 1\gamma 2_{EM}$  receptor structure relative to corresponding TM helices in the human  $\beta 3$  GABA<sub>A</sub> receptor, further demonstrating the asymmetric structure of the TMD (Figure 6B).

The asymmetry in the TMD complicates defining whether the structure represents an open or closed state as the M2 helices lining the pore in the  $\beta$  subunit display a similar orientation as in the desensitized state of the human  $\beta 3$  GABA<sub>A</sub> receptor, yet the  $\alpha$

subunits are farther from the pseudo 5-fold axis, enlarging the pore (Figure 6B). In the future, GABA<sub>A</sub> receptor structures determined using different detergents, lipids or ligand conditions will be important in elucidating the closed/open state of the channel.

## Conclusion

Here we directly visualize the subunit stoichiometry and subunit arrangement for a heterotrimeric GABA<sub>A</sub> receptor. While previous studies have suggested that GABA<sub>A</sub> receptor assembly occurs via defined pathways that limit the receptor diversity (Sarto-Jackson and Sieghart, 2008), precise molecular mechanisms regarding assembly are unknown. If we consider how heteromeric GABA<sub>A</sub> receptors form from  $\alpha$ ,  $\beta$  and  $\gamma$  subunits, we speculate that the larger contact areas in the ECD region makes formation of the  $\beta(+)/\alpha(-)$  interface favorable, thus leading to  $\alpha/\beta$  assembly intermediates, which then transition to  $(\alpha/\beta)_2$  intermediates. The crucial glycosylation site on the  $\alpha$  subunit at Asn110 makes it such that addition of a third  $\alpha$  subunit to form the pentamer is disfavored, due to steric clashes, and that either a  $\beta$  or a  $\gamma$  subunit will be incorporated to complete the heteropentamer (Figure 7). Thus, the glycosylation at Asn110 of the  $\alpha$  subunits not only plays an important role in ion channel assembly, but it may also be important to ion channel function.

This is the first direct visualization of the GABA binding site. Interestingly, we also find a strong density at a non-canonical site at the  $\alpha(+)/\beta(-)$  interface. We postulate that this density is GABA, although it is also possible that it represents a ligand that co-purified with the receptor and could be a binding site for agonists or other small molecules that are involved in regulation of the receptor function. Our results lay the foundation for future studies directed towards developing novel therapeutic agents that modulate GABA<sub>A</sub>



receptors, provide methods to express and elucidate structures of GABA<sub>A</sub> receptors and illuminate the role of post translational modifications on GABA<sub>A</sub> receptor assembly, structure and function.

## **MATERIALS AND METHODS**

### **Construct description**

The full-length rat GABA<sub>A</sub> receptor subunit isoforms  $\alpha 1$  (Gene ID 29705) and  $\gamma 2S$  (Gene ID 29709) with the native signal sequence were a gift from Dr. David S. Weiss. The  $\alpha 1$ -LT construct was generated by replacing a portion of the M3/M4 cytoplasmic loop from 313-381 by a Gly-Thr linker and adding a thrombin site and a His<sub>8</sub> tag to the C-terminus. The  $\beta 1$ -LT subunit (Gene ID 25450) was synthesized and cloned into pEG BacMam by Bio Basic Inc with residues K309-K414 replaced with a Gly-Thr linker, along with a thrombin site and a His<sub>8</sub> tag at the C-terminus. A bicistronic construct called  $\alpha 1\beta 1_{EM}$  containing  $\alpha 1$ -LT and  $\beta 1$ -LT, in the context of the pEG BacMam vector, was used for large scale expression. The  $\gamma 2S_{EM}$  subunit construct has a three-residue (Gly-Arg-Ala) insertion between Asp374 and Cys375 along with a thrombin site, a His<sub>8</sub> tag and a 1D4 tag at the C-terminus. For electrophysiology experiments the FusionRed fluorophore was inserted in the  $\gamma 2S$  subunit within the M3/M4 loop using an Ascl restriction site; this construct is called  $\gamma 2S$ -FR. A cartoon depiction of the constructs is provided in Supplementary Figure 1.

### **Preparation of an $\alpha$ subunit-specific Fab**

The purified  $\alpha 1\beta 1_{EM}$  receptor complex in lauryl maltose neopentyl glycol was used for immunization. Initial screening returned a large number (>200) of IgG positive mAb candidates. ELISA screening was used to determine the highest binding antibodies against receptor in the native and denatured states at a 1:300 dilution. Those that selectively bound to the native state were chosen for further characterization. Subsequent ELISA binding results at a 1:3000 dilution further filtered the candidate pool to 40

supernatants which were examined by western dot blot. Subsequent FSEC analysis identified 8E3 as a  $\alpha 1$  specific antibody (Supplementary Figure 1). Isolated mAB at 0.5 mg/ml in 50 mM NaPO<sub>4</sub> pH 7 buffer containing 10 mM EDTA, 10 mM L-Cys, 1:100 papain (w/w) was digested for 2 hrs at 37 °C. The reaction was quenched by adding 30 mM Idoacetamide and placing on ice for 20 mins in the dark. After verification of the digestion by SDS page, the Fc portion was separated using Protein A resin and the flow through containing Fab was collected and concentrated for further use.

### **Expression and purification**

P1 virus for the  $\alpha 1\beta 1_{EM}$  and the  $\gamma 2S_{EM}$  was generated and amplified using standard procedures to obtain P2 virus. Viruses were stored at 4 °C in the dark and supplemented with 1% FBS. Virus titer was determined using flow cytometry in a ViroCyt Virus Counter 2100 (Ferris et al., 2011). The triheteromer ( $\alpha 1\beta 1\gamma 2S_{EM}$ ) was expressed in TSA201 suspension cells. Infection was performed at a cell density of 1.5-3x10<sup>6</sup> cells/mL in Gibco Freestyle 293 Expression medium supplemented with 1% FBS and placed in a humidity- and CO<sub>2</sub>-controlled incubator. The total volume of virus added was less than 10% of the culture volume in all cases. Cells were infected with an MOI of 2 for both the viruses. After 24 hrs of infection at 30 °C, sodium butyrate and picrotoxinin were added at final concentrations of 10 mM and 12.5  $\mu$ M, respectively, and the flasks were shifted to 27 °C for another 24 hrs. All procedures thereafter were done either on ice or in a cold room. Cells were harvested by centrifugation and the pellets were washed with TBS pH 8 containing 25 mM MgCl<sub>2</sub> and 5 mM CaCl<sub>2</sub>. The pellets were re-suspended in 30 mL/L of culture volume in wash buffer with 1 mM PMSF, 1X protease inhibitors (leupeptin, pepstatin and aprotinin), 1.5 mM GABA, 20  $\mu$ M ivermectin, and 25  $\mu$ g/mL DNase I. Cells

were then sonicated for a 3:30 min cycle (15 sec on/off) while stirring. Cell debris was removed by centrifugation at 7500 g for 20 mins, followed by centrifugation at 125000 g for 1.5 hrs, to pellet the cellular membranes. Membranes were re-suspended (~ 7 ml/lit culture) in 20 mM NaPO<sub>4</sub> pH 8, 200 mM NaCl, 1 mM MgCl<sub>2</sub>, 1 mM CaCl<sub>2</sub>, 5 µg/mL DNase I, 0.3 mM PMSF, 1.5 mM GABA and 10 µM ivermectin and mechanically homogenized. Membranes were solubilized by adding 2% (w/v) C12M and 1 mM CHS for 1 hr at 4 °C. Solubilized membranes were centrifuged for 50 min at 125000 g. The supernatant was then mixed with 1D4 affinity resin equilibrated in 20 mM NaPO<sub>4</sub> pH 8, 200 mM NaCl, and 1 mM C12M for 3-4 hrs at 4 °C with gentle mixing. The resin was washed with 100 column volumes of the equilibration buffer; elution was achieved using a buffer supplemented with 0.2 mM 1D4 peptide. The eluted protein was concentrated by ultrafiltration, followed by the addition of 2.1 molar fold excess of 8E3 Fab. The concentrated sample was loaded onto a Superose 6 increase 10/300 GL column equilibrated with 20 mM HEPES pH 7.3, 200 mM NaCl, 1 mM C12M and 1.5 mM GABA. The flow rate was kept at 0.5 mL/min.

### **Radio ligand binding assay**

Binding assays were performed with the 10 nM α1β1γ2S<sub>EM</sub> receptor-Fab complex using either 0.75-500 nM [<sup>3</sup>H]-muscimol or 1-1000 nM [<sup>3</sup>H]-flunitrazepam in a buffer containing 20 mM Tris pH 7.4, 150 mM NaCl, 1 mM DDM, 20 µg/ml BSA and 1 mg/ml YiSi Copper HIS TAG scintillation proximity assay beads (Perkin Elmer, MA). Flunitrazepam binding was measured in the presence of 1.5 mM GABA. Non-specific signal was determined in the presence of 1 mM GABA for the muscimol and 1 mM diazepam for flunitrazepam. Experiments were performed using triplicate measurements. Data was analyzed using Prism 7.02 software (GraphPad, CA) using one site binding model.

## **Electrophysiology**

TSA-201 cells grown at 30 °C in suspension were transfected with plasmid DNA encoding the bicistronic  $\alpha\beta 1_{EM}$  construct and the monocistronic  $\gamma 2S-FR$  construct using Lipofectamine 2000. Cells were plated on glass coverslips 2 hours prior to recording, and all recordings were conducted 18-36 hours after transfection.

Pipettes were pulled and polished to 2-4 M $\Omega$  resistance and filled with internal solution containing (in mM): 140 CsCl, 4 NaCl, 4 MgCl<sub>2</sub>, 0.5 CaCl<sub>2</sub>, 5 EGTA, 10 HEPES pH 7.4. Unless otherwise noted, external solutions contained (in mM): 140 NaCl, 5 KCl, 1 MgCl<sub>2</sub>, 2 CaCl<sub>2</sub>, 10 Glucose, 10 HEPES pH 7.4. For all electrophysiology experiments requiring Fab, 25 nM Fab was maintained in all bath and perfusion solutions. For potentiation experiments, currents were elicited via step from bath solution to solution supplemented with either 5  $\mu$ M GABA or 5  $\mu$ M GABA + 1  $\mu$ M Diazepam. An unpaired t-test with Welch's correction was used to analyze changes in potentiation with or without Fab. External solution exchange was accomplished using the RSC-160 rapid solution changer (Bio-Logic). Membrane potential was clamped at -60 mV and the Axopatch 200B amplifier was used for data acquisition. All traces were recorded and analyzed using the pClamp 10 software suite.

## **Cryo-EM data collection**

Gold 200 mesh quantifoil 1.2/1.3 grids were covered with a fresh layer of 2 nm carbon using a Leica EM ACE600 coater. The grids were glow discharged at 15 mA for 30 s using Pelco easiGlow followed by the application of 4  $\mu$ L 1 mg/mL PEI (MAX Linear Mw 40k from Polysciences) dissolved in 25 mM HEPES pH7.9. After 2 minutes, PEI was removed using filter paper immediately followed by two washes with water. The grids

were dried at room temperature for 15 mins. Graphene oxide (Sigma) at 0.4 mg/mL was centrifuged at 1000 g for 1 min and applied to the grids for 2 mins. Excess graphene oxide was blotted away followed by two water washes. The grids were dried once again for 15 mins at room temperature before use. 2.5  $\mu$ L of 0.15 mg/mL  $\alpha$ 1 $\beta$ 1 $\gamma$ 2S<sub>EM</sub> receptor sample was applied to the grids with blot-force of 1 for 2 s using FEI Vitrobot in 100% humidity.

Grids were loaded into a Titan Krios microscope operated at 300 kV. Images were acquired on a Falcon 3 direct-detector using counting mode at a nominal magnification of 120000, corresponding to a pixel size of 0.649 Å, and at a defocus range between -1.2  $\mu$ m to -2.5  $\mu$ m. Each micrograph was recorded over 200 frames at a dose rate of  $\sim$ 0.6 e<sup>-</sup>/pixel/s and a total exposure time of 40 s, resulting in a total dose of  $\sim$ 37 e<sup>-</sup>/Å<sup>2</sup>.

### **Cryo-EM data analysis**

A total of 1391 movie stacks were collected and corrected for beam-induced motion was carried out using MotionCor2 (Zheng et al., 2017) (Supplementary Figure 4). The dose weighted micrographs were used for determination of defocus values by Gctf (Zhang, 2016). Micrographs with large areas of ice contamination, multiple layers of graphene oxide, defocus value larger than -2.5  $\mu$ m or defocus values smaller than -1.2  $\mu$ m were deleted. Thus 1097 'good' micrographs were retained for the following image analysis. A total of 183040 particles were automatically picked by DoG-picker (Voss et al., 2009; Zhang, 2016), binned by 2x, and imported into cryoSPARC (Punjani et al., 2017) for 2D classification. In order to populate the particle stack with receptor-Fab complexes, only classes with clear features and clear background were chosen. A total of 34911 particles were retained and used to generate an initial model, which was then subjected to homogenous refinement using cryoSPARC. The stack of 34911 particles and the model were employed for further processing using RELION (Scheres, 2012).

We also carried out reference-based particle picking from the 1097 'good' micrographs with RELION, using seven of the 2D class averages from the cryoSPARC processing described above to derive the templates (Supplementary Figure 4). This process yielded 216543 particles which then were binned by 2x and subjected to one round of 2D classification to remove the 'junk' particles, yielding a total of 62844 particles. Prior to further 3D refinement, the 'DoG-picker' selected particles (34911) were combined with the templated-based particles (62844) and an in-house script was used to remove the duplicates. A total of 68793 particles remained after removal of duplicates.

The combined, 2x binned particles were then used for 3D refinement in RELION by applying a mask focusing on the receptor and the variable domains of the Fabs. Subsequent 3D classification, without alignment, yielded 6 classes (Supplementary Figure 4). The 49417 particles belonging to class 2 were selected for a final refinement by RELION using the receptor-variable domain mask, yielding a map at  $\sim 3.8$  Å resolution (Supplementary Figure 5). We refer to this map as the 'whole map'. The 'whole map' was sharpened using LocalScale (Jakobi et al., 2017). To further refine the ECD of the receptor, another mask focused on the ECD of the receptor and the variable domains of the Fabs was created, omitting the transmembrane domain and the micelle. Unbinned particles belonging to class 2 and class 3 were reextracted and used in refinement, along with the ECD-variable domain mask, yielding a map at  $\sim 3.1$  Å resolution (ECD map; Supplementary Figure 5). The ECD map was sharpened using Phenix (Terwilliger et al., 2018). Local resolution was estimated using blocres as implemented in Bsoft (Heymann and Belnap, 2007).

Overall estimations of the resolutions of the reconstructions were carried out by Fourier Shell Correlation (FSC) = 0.143 criterion analysis (Scheres and Chen, 2012). The local resolution for the whole map varies about from 3.5 Å to 7 Å (Supplementary Figure 5) where the low resolution areas are in the flexible or disordered regions of the TMD and constant domains of the Fabs. The local resolution for ECD map varies from about 3 Å to 4 Å.

### **Model building**

Homology models for the  $\alpha$ 1,  $\beta$ 1 and  $\gamma$ 2 subunit were generated using SWISS-MODEL (Biasini et al., 2014). The 'initial model' for the pentamer was generated via rigid body fitting of the subunit models to the density map using UCSF Chimera (Pettersen et al., 2004). The high quality of ECD map facilitated building of the ECD structure by way of iterative cycles of manual adjustment in Coot (Emsley and Cowtan, 2004) and refinement using phenix (Afonine et al., 2018). After phenix refinement, the map correlation coefficient (CC) between the map and the ECD model was 0.80, indicative of a good fit between the ECD model and the ECD map.

To build the 'whole model' using the whole map, the TMD derived from the 'initial model' was combined with the ECD model using Coot. Due to the lower resolution of the density in the TMD, it was only possible to fit the helices to their associated density and some of the residues with large side chains.  $\alpha$ -Helical secondary structure restraints were places on the TMD helices throughout refinement. Due to the weak density associated with the loop between helices M3-M4 (M3M4 loop) for all of the subunits, and with the M4 helices for the two  $\alpha$  subunits and the  $\gamma$  subunit, the M4 helices together with the M3M4 loop were not included in the whole model. After phenix refinement, the CC between the



whole map model and whole map was 0.74. The final model has a good stereochemistry as evaluated by MolProbity (Chen et al., 2010) (Supplementary Table 1).

## **ACKNOWLEDGEMENTS**

We thank David Weiss for the gift of GABA<sub>A</sub> receptor constructs, Dan Cawley for monoclonal antibody production, Cynthia Czajkowski and Dennis Dougherty for helpful comments, Avinash Patel and Eva Nogales for the graphene oxide protocol, and Heidi Owen for assistance with manuscript preparation. We also acknowledge the use of the Multiscale Microscopy Center and the Exacloud supercomputer cluster at OHSU. This research was supported by the NIH (E.G. R01 GM100400). E.G. is an Investigator with the Howard Hughes Medical Institute.

## **AUTHOR CONTRIBUTIONS**

D.C. carried out initial construct screening and isolated 8E3 mAb and Fab. S.P. carried out large scale purification, ligand binding experiments and negative stain and cryo-EM. H.Z. performed cryo-EM and carried out reconstructions and model building and refinement. J.Y. carried out receptor expression and cryo-EM reconstructions and model building. The electrophysiology was done by N.Y. All authors contributed to the analysis of the data and the preparation of the manuscript.

## **AUTHOR INFORMATION**

The cryo-EM maps and coordinates for whole map and ECD are available upon request. Correspondence and requests for materials should be addressed to E.G. (gouauxe@ohsu.edu)

## REFERENCES

- Amin, J., Brooks-Kayal, A., and Weiss, D.S. (1997). Two tyrosine residues on the alpha subunit are crucial for benzodiazepine binding and allosteric modulation of gamma-aminobutyric acid receptors. *Mol Pharmacol* 51, 833-841.
- Basak, S., Gicheru, Y., Samanta, A., Molugu, S.K., Huang, W., Fuente, M., Hughes, T., Taylor, D.J., Neiman, M.T., Moiseenkova-Bell, V., *et al.* (2018). Cryo-EM structure of 5-HT<sub>3A</sub> receptor in its resting conformation. *Nature Commun* 9, 514.
- Baumann, S.W., Bauer, P.O., and Sigel, E. (2002). Forced subunit assembly in  $\alpha 1\beta 2\gamma 2$  GABAA receptors. Insight into the absolute arrangement. *J Biol Chem* 277.
- Baumann, S.W., Baur, R., and Sigel, E. (2001). Subunit arrangement of  $\gamma$ -aminobutyric acid type A receptors *J Biol Chem* 276, 36275-36280.
- Baur, R., Minier, F., and Sigel, E. (2006). A GABAA receptor of defined subunit composition and positioning: concatenation of five subunits. *FEBS Lett* 580, 1616-1620.
- Blom, N., Sicheritz-Ponten, T., Gupta, R., Gammeltoft, S., and Brunak, S. (2004). Prediction of post-translational glycosylation and phosphorylation of proteins from the amino acid sequence. *Proteomics* 4, 1633-1649.
- Braat, S., and Kooy, R.F. (2015). The GABAA receptor as a therapeutic target for neurodevelopmental disorders. *Neuron* 86, 1119-1130.
- Buller, A.L., Hastings, G.A., Kirkness, E.F., and Fraser, C.M. (1994). Site-directed mutagenesis of N-linked glycosylation sites on the gamma-aminobutyric acid type A receptor alpha 1 subunit. *Mol Pharmacol* 46, 858-865.
- Chang, Y., Wang, R., Barot, S., and Weiss, D.S. (1996). Stoichiometry of a recombinant GABAA receptor. *J Neurosci* 16, 5415-5424.
- Chen, V.B., Arendall, W.B., 3rd, Headd, J.J., Keedy, D.A., Immormino, R.M., Kapral, G.J., Murray, L.W., Richardson, J.S., and Richardson, D.C. (2010). MolProbity: all-atom structure validation for macromolecular crystallography. *Acta Crystallogr D Biol Crystallogr* 66, 12-21.
- Chua, H.C., and Chebib, M. (2017). GABAA Receptors and the Diversity in their Structure and Pharmacology. *Adv Pharmacol* 79, 1-34.

- Cymes, G.D., and Grosman, C. (2016). Identifying the elusive link between amino acid sequence and charge selectivity in pentameric ligand-gated ion channels. *Proc Natl Acad Sci USA*, E7106–E7115.
- Du, J., Lu, W., Wu, S., Cheng, Y., and Gouaux, E. (2015). Glycine receptor mechanism elucidated by electron cryo-microscopy. *Nature* 526, 224-229.
- Farrar, S.J., Whiting, P.J., Bonnert, T.P., and McKernan, R.M. (1999). Stoichiometry of a ligand-gated ion channel determined by fluorescence energy transfer. *J Biol Chem* 274, 10100-10104.
- Ferris, M.M., Stepp, P.C., Ranno, K.A., Mahmoud, W., Ibbitson, E., Jarvis, J., Cox, M.M., Christensen, K., Votaw, H., Edwards, D.P., *et al.* (2011). Evaluation of the Virus Counter(R) for rapid baculovirus quantitation. *J Virol Methods* 171, 111-116.
- Gamian, O.A. (1992). [Nomenclature of glycoproteins, glycopeptides and peptidoglycans]. *Postepy Biochem* 38, 81-87.
- Gielen, M., and Corringer, P.J. (2018). The dual-gate model for pentameric ligand-gated ion channels activation and desensitization. *J Physiol* 10, 1873-1902.
- Goehring, A., Lee, C.H., Wang, K.H., Michel, J.C., Claxton, D.P., Bacongus, I., Althoff, T., Fisher, S., Garcia, K.C., and Gouaux, E. (2014). Screening and large-scale expression of membrane proteins in mammalian cells for structural studies. *Nat Protoc* 9, 2574-2585.
- Hassaine, G., Deluz, C., Grasso, L., Wyss, R., Tol, M.B., Hovius, R., Graff, A., Stahlberg, H., Tomizaki, T., Desmyter, A., *et al.* (2014). X-ray structure of the mouse serotonin 5-HT3 receptor. *Nature* 512, 276-281.
- Hauser, C.A., Wetzel, C.H., Berning, B., Gerner, F.M., and Rupprecht, R. (1997). Flunitrazepam has an inverse agonistic effect on recombinant alpha6beta2gamma2-GABAA receptors via a flunitrazepam-binding site. *J Biol Chem* 272, 11723-11727.
- Hibbs, R.E., and Gouaux, E. (2011). Principles of activation and permeation in an anion-selective Cys-loop receptor. *Nature* 474, 54-60.
- Hilf, R., and Dutzler, R. (2008). X-ray structure of a prokaryotic pentameric ligand-gated ion channel. *Nature* 452, 375-379.

- Hirose, S. (2014). Mutant GABAA receptor subunits in genetic (idiopathic) epilepsy. In *Progress in Brain Research*, K.S. Ortrud, ed. (Amsterdam, The Netherlands: Elsevier B.V.), pp. 55-85.
- Huang, X., Chen, H., Michelsen, K., Schneider, S., and Shaffer, P.L. (2015). Crystal structure of human glycine receptor- $\alpha 3$  bound to antagonist strychnine. *Nature* *526*, 277-280.
- Johnston, G.A. (2014). Muscimol as an ionotropic GABA receptor agonist. *Neurochem Res* *39*, 1942-1947.
- Jones, B.L., and Henderson, L.P. (2007). Trafficking and potential assembly patterns of epsilon-containing GABAA receptors. *J Neurochem* *103*, 1258-1271.
- Julenius, K., Molgaard, A., Gupta, R., and Brunak, S. (2005). Prediction, conservation analysis, and structural characterization of mammalian mucin-type O-glycosylation sites. *Glycobiology* *15*, 153-164.
- Kawate, T., and Gouaux, E. (2006). Fluorescence-detection size-exclusion chromatography for precrystallization screening of integral membrane proteins. *Structure* *14*, 673-681.
- Li, P., Eaton, M.M., Steinbach, J.H., and Akk, G. (2013). The benzodiazepine diazepam potentiates responses of  $\alpha 1\beta 2\gamma 2L$  gamma-aminobutyric acid type A receptors activated by either gamma-aminobutyric acid or allosteric agonists. *Anesthesiology* *118*, 1417-1425.
- Lummis, S.C. (2009). Locating GABA in GABA receptor binding sites. *Biochem Soc Trans* *37*, 1343-1346.
- Lynagh, T., and Pless, S.A. (2014). Principles of agonist recognition in Cys-loop receptors. *Frontiers in Physiology* *5*, 1-12.
- MacKenzie, D., Arendt, A., Hargrave, P., McDowell, J.H., and Molday, R.S. (1984). Localization of binding sites for carboxyl terminal specific anti-rhodopsin monoclonal antibodies using synthetic peptides. *Biochemistry* *23*, 6544-6549.
- Maenaka, K., Kawai, G., Watanabe, K., Sunada, F., and Kumagai, I. (1994). Functional and structural role of a tryptophan generally observed in protein-carbohydrate interaction. TRP-62 of hen egg white lysozyme. *J Biol Chem* *269*, 7070-7075.

- Miller, P.S., and Aricescu, A.R. (2014). Crystal structure of a human GABAA receptor. *Nature* 512, 270-275.
- Mukhtasimova, N., Free, C., and Sine, S.M. (2005). Initial coupling of binding to gating mediated by conserved residues in the muscle nicotinic receptor. *J Gen Physiol* 126, 23-39.
- Newell, J.G., McDevitt, R.A., and Czajkowski, C. (2004). Mutation of glutamate 155 of the GABAA receptor beta2 subunit produces a spontaneously open channel: a trigger for channel activation. *J Neurosci* 24, 11226-11235.
- Nys, M., Kesters, D., and Ulens, C. (2013). Structural insights into Cys-loop receptor function and ligand recognition. *Biochem Pharmacol* 86, 1054-1062.
- Purohit, P., and Auerbach, A. (2013). Loop C and the mechanism of acetylcholine receptor-channel gating. *J Gen Physiol* 141, 467-478.
- Richter, L., de Graaf, C., Sieghart, W., Varagic, Z., Morzinger, M., de Esch, I.J., Ecker, G.F., and Ernst, M. (2012). Diazepam-bound GABAA receptor models identify new benzodiazepine binding-site ligands. *Nat Chem Biol* 8, 455-464.
- Rudolph, U., and Mohler, H. (2014). GABAA receptor subtypes: Therapeutic potential in Down syndrome, affective disorders, schizophrenia, and autism. *Annu Rev Pharmacol Toxicol* 54, 483-507.
- Sander, T., Frolund, B., Bruun, A.T., Ivanov, I., McCammon, J.A., and Balle, T. (2011). New insights into the GABA(A) receptor structure and orthosteric ligand binding: receptor modeling guided by experimental data. *Proteins* 79, 1458-1477.
- Sarto-Jackson, I., and Sieghart, W. (2008). Assembly of GABA(A) receptors (Review). *Mol Membr Biol* 25, 302-310.
- Sauguet, L., Poitevin, F., Murail, S., Van Renterghem, C., Moraga-Cid, G., Malherbe, L., Thompson, A.W., Koehl, P., Corringer, P.J., Baaden, M., *et al.* (2013). Structural basis for ion permeation mechanism in pentameric ligand-gated ion channels. *EMBO J* 32, 728-741.
- Scheres, S.H. (2012). RELION: implementation of a Bayesian approach to cryo-EM structure determination. *J Struct Biol* 180, 519-530.
- Scheres, S.H., and Chen, S. (2012). Prevention of overfitting in cryo-EM structure determination. *Nat Methods* 9, 853-854.

- Sigel, E., and Steinmann, M.E. (2012). Structure, function and modulation of GABAA receptors. *J Biol Chem* 287, 40224-40231.
- Sine, S.M., Wang, H.L., Hansen, S., and Taylor, P. (2010). On the origin of ion selectivity in the Cys-loop receptor family. *J Mol Neurosci* 40, 70-76.
- Smith, G.B., and Olsen, R.W. (1995). Functional domains of GABAA receptors. *Trends Pharmacol Sci* 16, 162-168.
- Teissere, J.A., and Czajkowski, C. (2001). A (beta)-strand in the (gamma)2 subunit lines the benzodiazepine binding site of the GABA A receptor: structural rearrangements detected during channel gating. *J Neurosci* 21, 4977-4986.
- Thompson, A.J., Lester, H.A., and Lummis, S.C. (2010). The structural basis of function in Cys-loop receptors. *Q Rev Biophys* 43, 449-499.
- Toyoshima, C., and Unwin, N. (1988). Ion channel of acetylcholine receptor reconstructed from images of postsynaptic membranes. *Nature* 336, 247-250.
- Tretter, V., Ehya, N., Fuchs, K., and Sieghart, W. (1997). Stoichiometry and assembly of a recombinant GABAA receptor subtype. *J Neurosci* 17, 2728-2737.
- Trudell, J.R., Messing, R.O., Mayfield, J., and Harris, R.A. (2014). Alcohol dependence: molecular and behavioral evidence. *Trends Pharmacol Sci* 35, 317-323.
- Unwin, N. (1993). Nicotinic acetylcholine receptor at 9 Å resolution. *J Mol Biol* 229, 1101-1124.
- Unwin, N. (2005). Refined structure of the nicotinic acetylcholine receptor. *J Mol Biol* 346, 967-989.
- Walsh, R.M.J., Roh, S.H., Gharpure, A., Morales-Perez, C.L., Teng, J., and Hibbs, R.E. (2018). Structural principles of distinct assemblies of the human  $\alpha 4\beta 2$  nicotinic receptor. *Nature* 557, 261-265.
- Wongsamitkul, N., Maldifassi, M.C., Simeone, X., Baur, R., Ernst, M., and Sigel, E. (2017). alpha subunits in GABAA receptors are dispensable for GABA and diazepam action. *Sci Rep* 7, 15498.
- Wu, C., and Sun, D. (2015). GABA receptors in brain development, function and injury. *Metab Brain Dis* 30, 367-379.
- Zhang, K. (2016). Gctf: Real-time CTF determination and correction. *J Struct Biol* 193, 1-12.



## FIGURES AND FIGURE LEGENDS

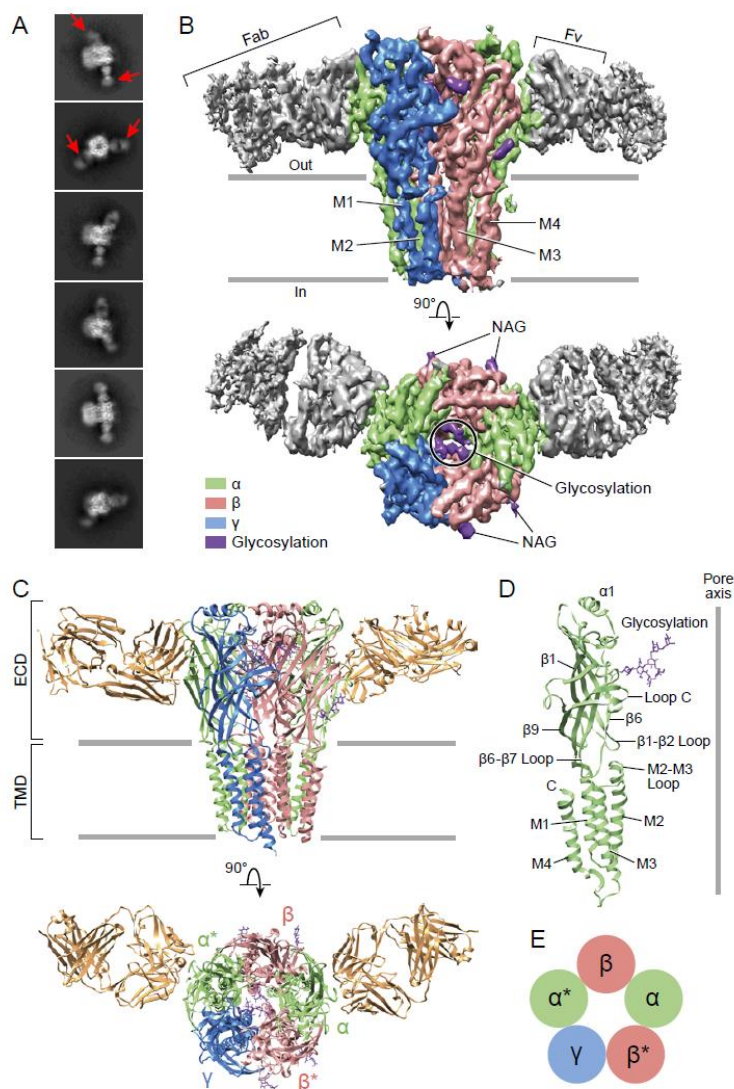

**Figure 1. Architecture of the  $\alpha 1\beta 1\gamma 2_{EM}$  GABA<sub>A</sub> receptor.** (a) 2D class averages. Red arrows indicate 8E3 Fab bound to  $\alpha$  subunits. (b) The cryo-EM map of the entire receptor viewed parallel to membrane plane. The  $\alpha$ ,  $\beta$  and  $\gamma$  subunits are colored by lime, salmon and marine, respectively. (c) Cartoon representation of the receptor viewed parallel to the membrane plane. The extracellular domain (ECD) and transmembrane domain (TMD) are indicated. (d) Cartoon representation of an  $\alpha$  subunit. (e) Schematic representation of subunit arrangement, viewed from the extracellular side of the membrane.

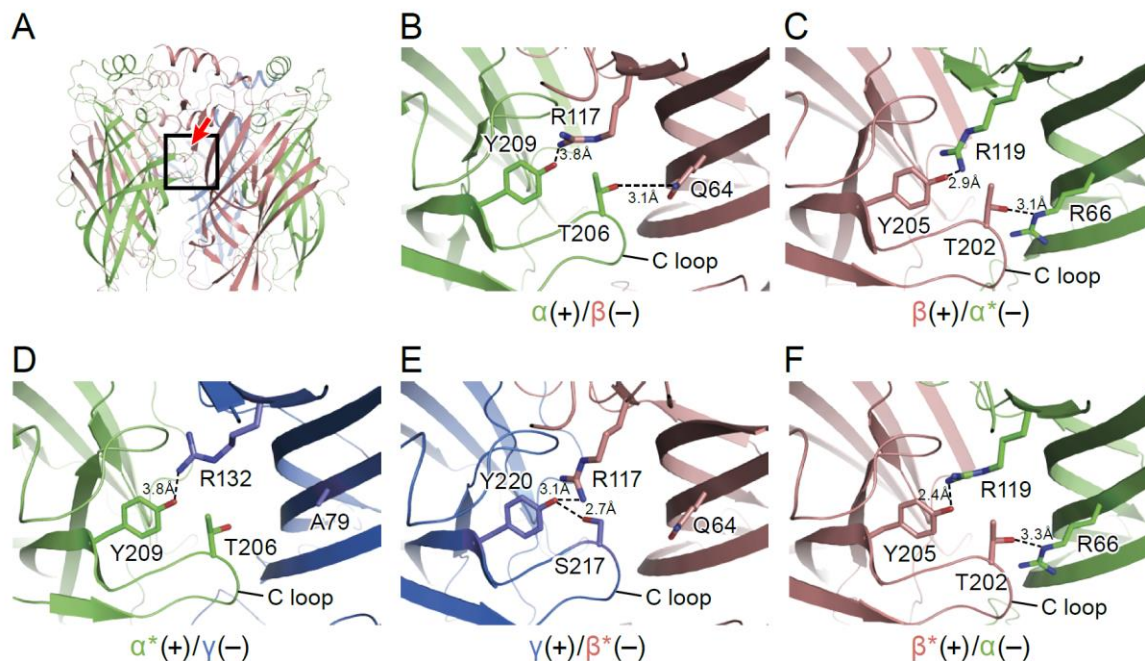

**Figure 2. Intersubunit interactions.** (a) The interface region between the  $\alpha$  and  $\beta$  subunits, with the boxed area enlarged in panels b-f and the viewing angle indicated by an arrow. The  $\alpha$  and  $\alpha^*$  subunits are colored in salmon,  $\beta$  and  $\beta^*$  are colored in lime, and  $\gamma$  is colored in marine and shown as cartoon. Side chains for amino acids for which specific interactions were observed are shown with interactions depicted in dashed lines. In (b) is the  $\alpha(+)/\beta(-)$  interface, (c) the  $\beta(+)/\alpha*(-)$  the interface, (d) the  $\alpha*(+)/\gamma(-)$  interface, (e) the  $\gamma(+)/\beta*(-)$  interface and (f) the  $\beta*(-)/\alpha(-)$  interface.



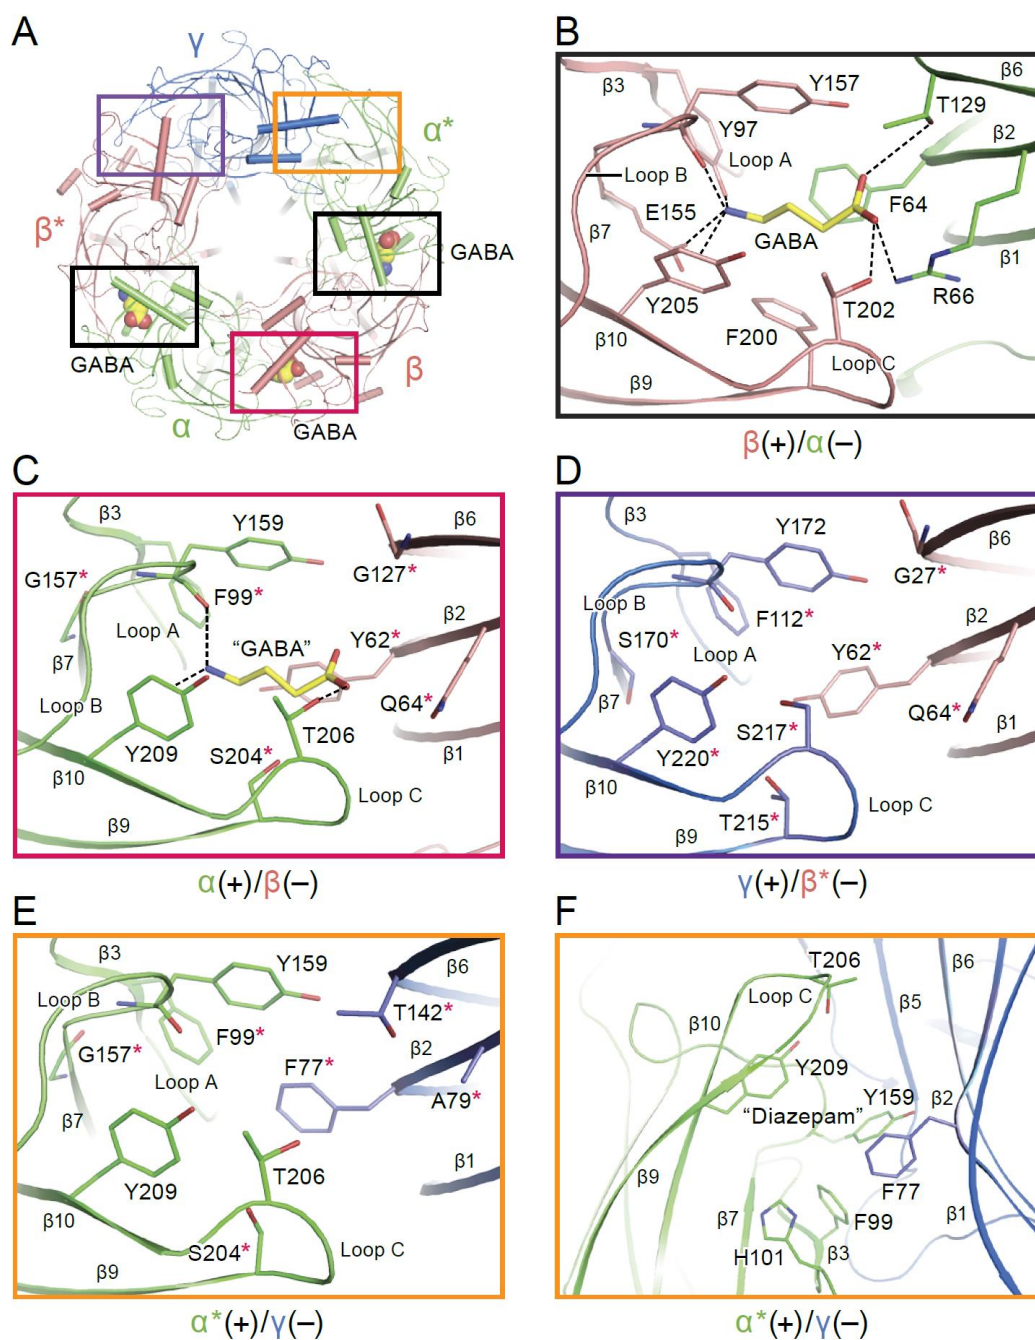

**Figure 3. Neurotransmitter binding sites.** (a) Top down view of the receptor looking from the extracellular side. The  $\alpha$  and  $\alpha^{*}$  subunits are colored in salmon,  $\beta$  and  $\beta^{*}$  are colored in lime, and  $\gamma$  is colored in marine. GABA molecules are shown in sphere representation. (b) View of the binding site between the  $\beta^{*}(+)/\alpha(-)$  subunits viewed parallel

to the membrane. Dashed lines indicate hydrogen bonds, cation- $\pi$  interactions and salt bridges. The  $\beta^*(+)$  and  $\alpha(-)$  subunits are colored in salmon and lime, respectively. The residues in the  $\beta^*(+)$  and  $\alpha(-)$  subunits and GABA are depicted in salmon, lime and yellow sticks, respectively. (c) View of the binding site between the  $\alpha(+)/\beta(-)$  subunits viewed parallel to the membrane. Subunits and residues are depicted in the same color code as in (b). The residues differing from the corresponding residues in the  $\beta^*(+)/\alpha(-)$  binding site are indicated with red stars. (d) View of the binding site between the  $\gamma(+)/\beta^*(-)$  subunits looking parallel to the membrane. Residues in the  $\gamma(+)$  and  $\beta^*(-)$  binding site are shown in marine and salmon sticks, respectively. The residues differing from the corresponding residues in the  $\beta^*(+)/\alpha(-)$  binding site are indicated with red stars. (e) View of the binding site between the  $\alpha^*(+)/\gamma(-)$  binding site viewed parallel to the membrane. Residues in the  $\alpha^*(+)$  and  $\gamma(-)$  binding site are shown in lime and marine sticks, respectively. The residues differing from the corresponding residues in  $\beta^*(+)/\alpha(-)$  are indicated with red stars. (f) The similar view of the diazepam binding site as in panel (e).

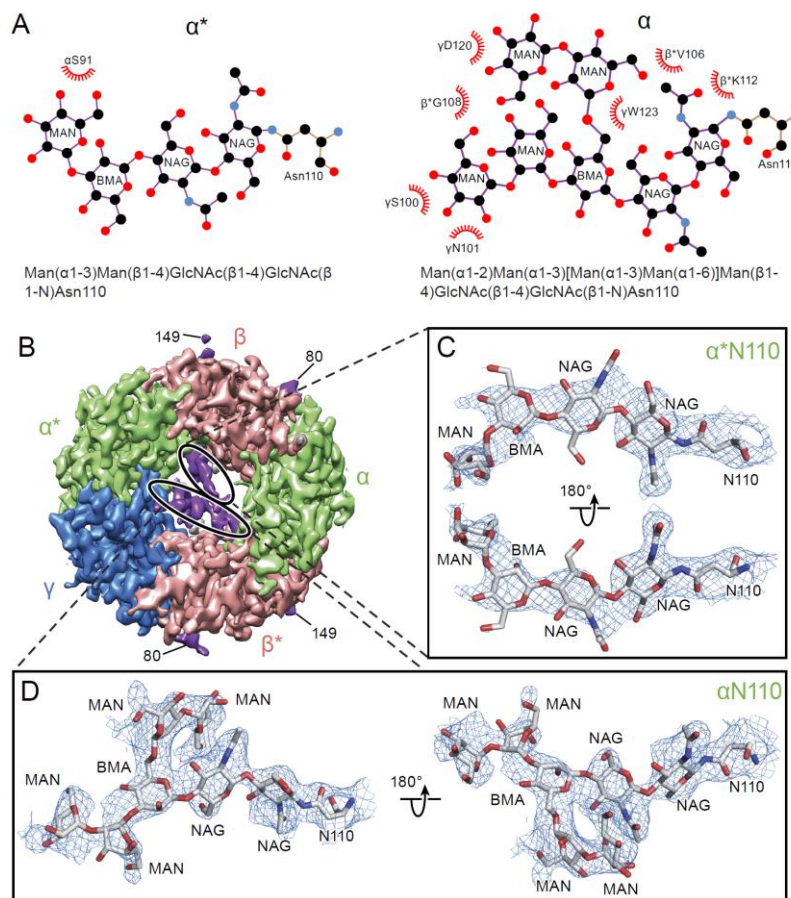

**Figure 4. Glycosylation sites in the extracellular vestibule.** (a) Schematic of the sugar chain chemical structure for the Asn110 modification. The amino acids interacting with the sugar chains are also shown. The names of the carbohydrates are given at the bottom of the panel (Gamian, 1992). (b) Top down view of ECD map. The  $\alpha$ ,  $\beta$  and  $\gamma$  subunits are colored by light green, salmon and blue, respectively. The glycosylation densities are colored by purple. The related Asn residue numbers are labeled. (c) Two views of the density of the glycosylation from the  $\alpha^*$  subunit, isolated and fitted with 4 sugar molecules. Asn110 and the name of sugars are labeled. (d) Similar panel to (c), showing the density of the glycosylation on the  $\alpha$  subunit fit with a carbohydrate chain containing 7 sugar residues.

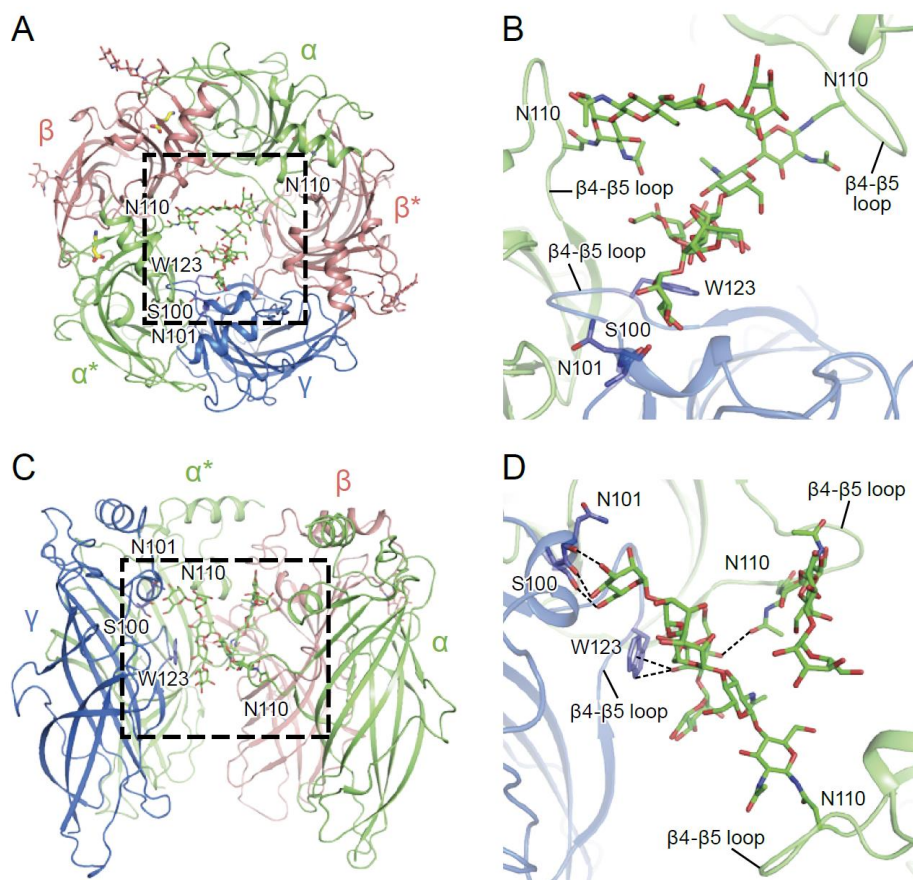

**Figure 5.  $\alpha$ -Subunit glycosylation and interaction with key residues.** (a) Top-down view of glycosylation pocket parallel to the membrane. The  $\alpha$  and  $\alpha^*$  subunits are colored in salmon, the  $\beta$  and  $\beta^*$  subunits are in lime and the  $\gamma$  subunit is in marine. Glycosylation from the  $\alpha$ /  $\alpha^*$  and  $\beta$ /  $\beta^*$  subunits are shown in green and salmon sticks. Interacting residues from the  $\gamma$  subunit are depicted in stick representation (marine). (b) Enlarged view of the glycosylation pocket indicated by the dash outlined frame in (a). The  $\beta$  and  $\beta^*$  subunits are removed for clarity. (c) Side view of the glycosylation pocket perpendicular to the membrane. The  $\beta^*$  subunit was removed for clarity. (d) Enlarged view of the glycosylation pocket from the dash outlined frame in (c). The  $\beta$  and  $\beta^*$  subunits were removed for clarity.



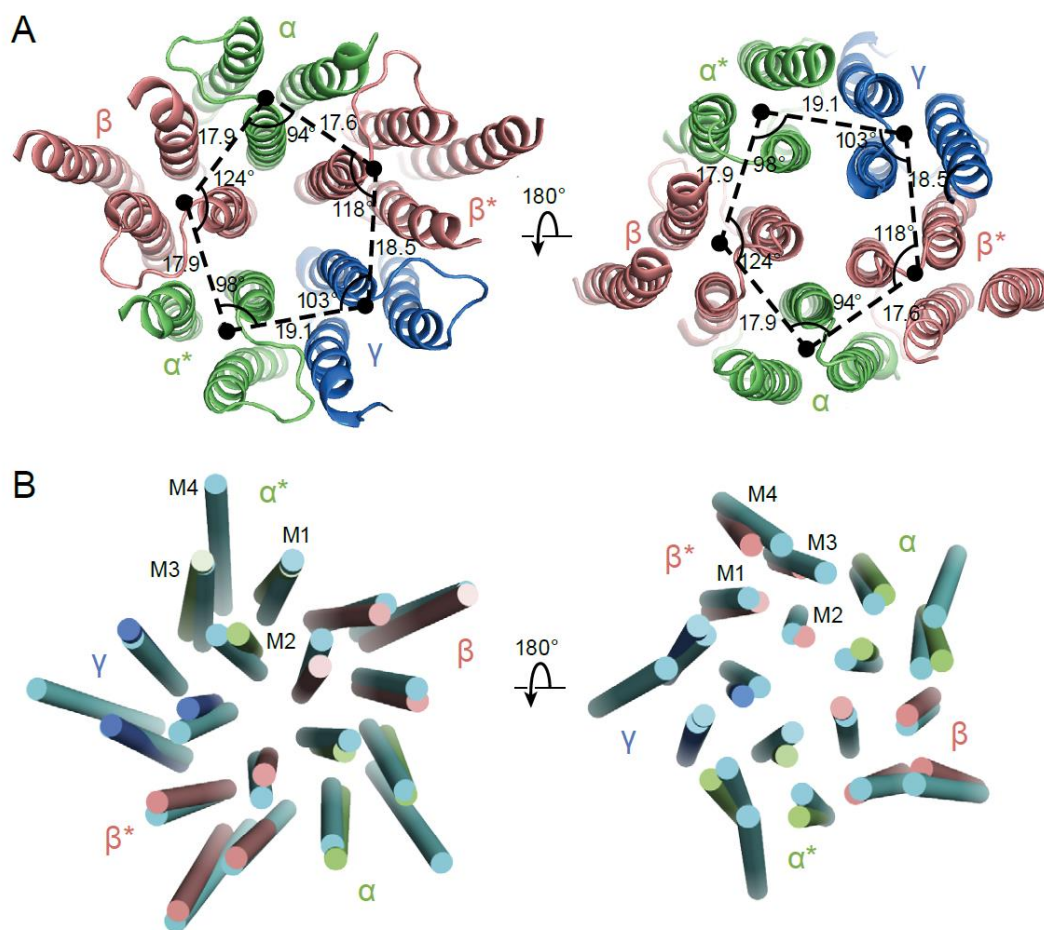

**Figure 6. Asymmetry in the TMD.** (a) View of the TMD from the extracellular (left panel) side or from the intracellular side (right panel) of the membrane. The  $\alpha$  and  $\alpha^*$  subunits are colored in salmon,  $\beta$  and  $\beta^*$  are colored in lime, and  $\gamma$  is colored in marine. Center of mass of M1, M2 and M3 helices for each subunit, shown as a solid black circle, was generated by PYMOL. Distances are in Å. (b) Superposition of the TMD in the GABA<sub>A</sub> receptor with human  $\beta_3$  (PDB code: 4COF). The TMD of the human  $\beta_3$  is colored in cyan.

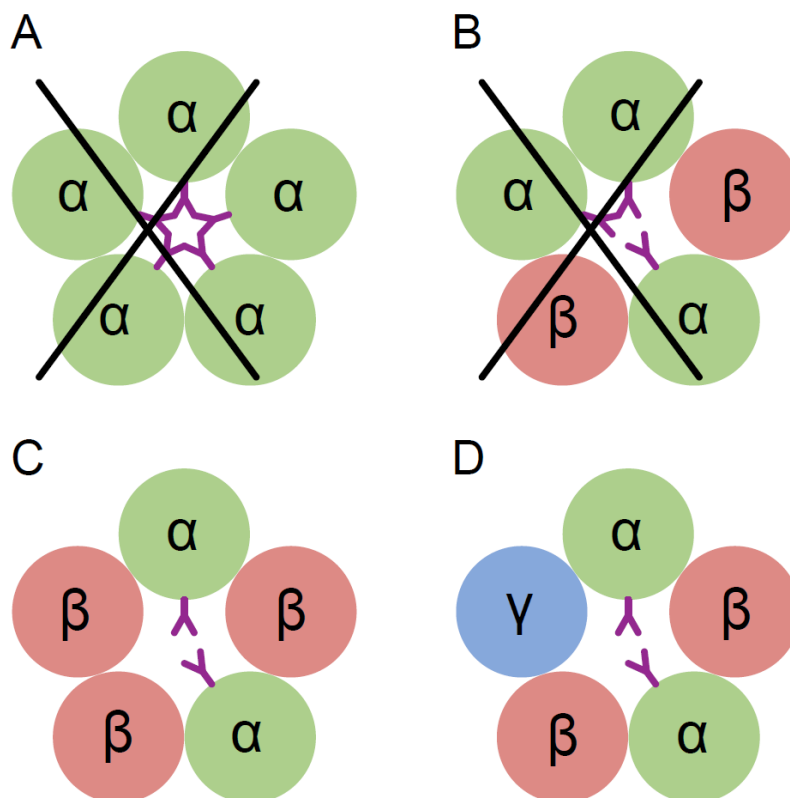

**Figure 7. Conceptual schematic of triheteromeric receptor assembly.** Steric clashes prevent the formation of a pentameric receptor with more than 2  $\alpha$  subunits, while other combinations are allowed. Individual subunits are marked and shown as circles. The glycosylation of the  $\alpha$  subunit at position Asn110 is shown as a purple 'Y'.

## SUPPLEMENTARY FIGURES AND FIGURE LEGENDS

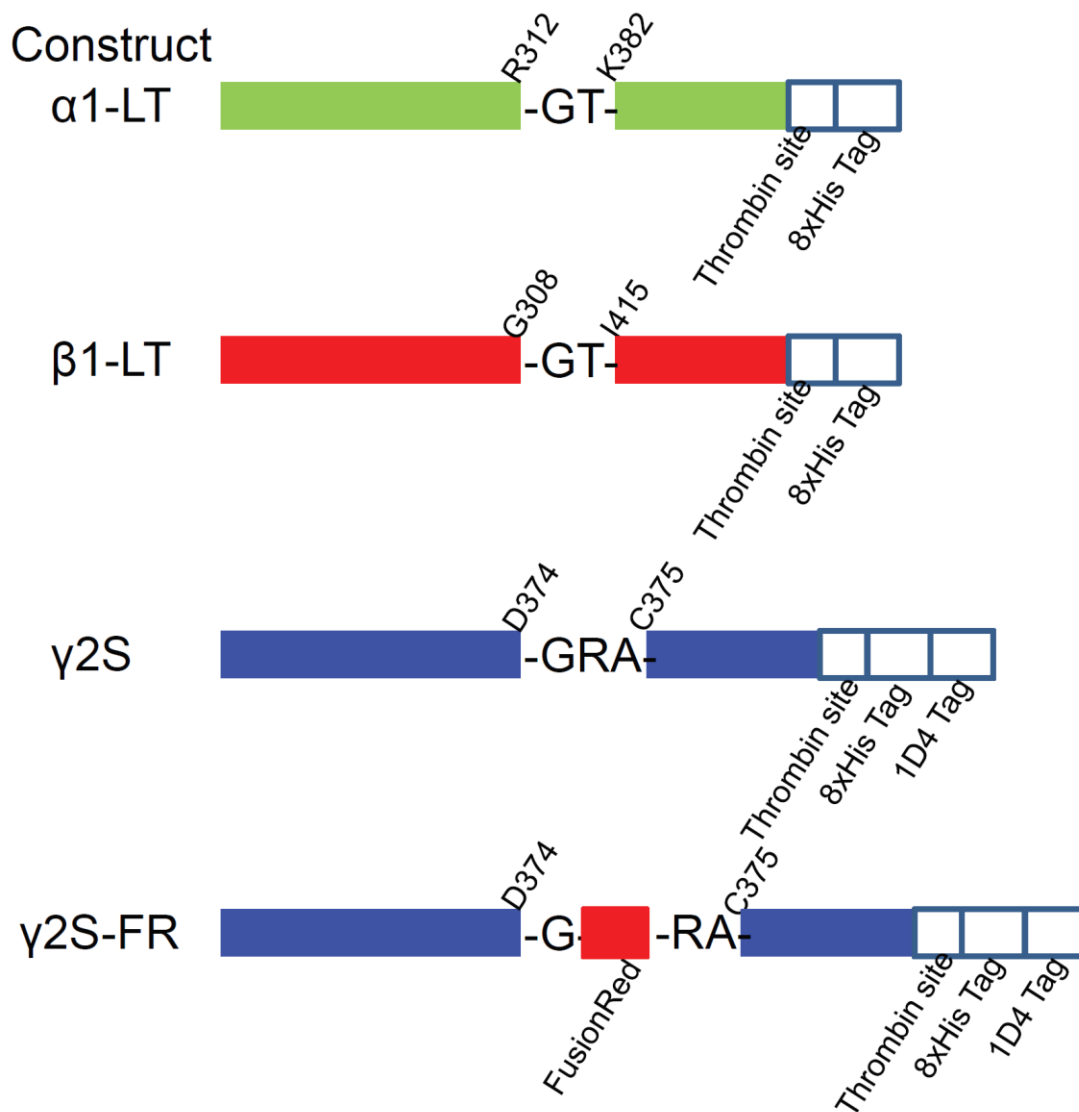

**Supplementary Figure 1.** Schematics for the constructs used in this study.

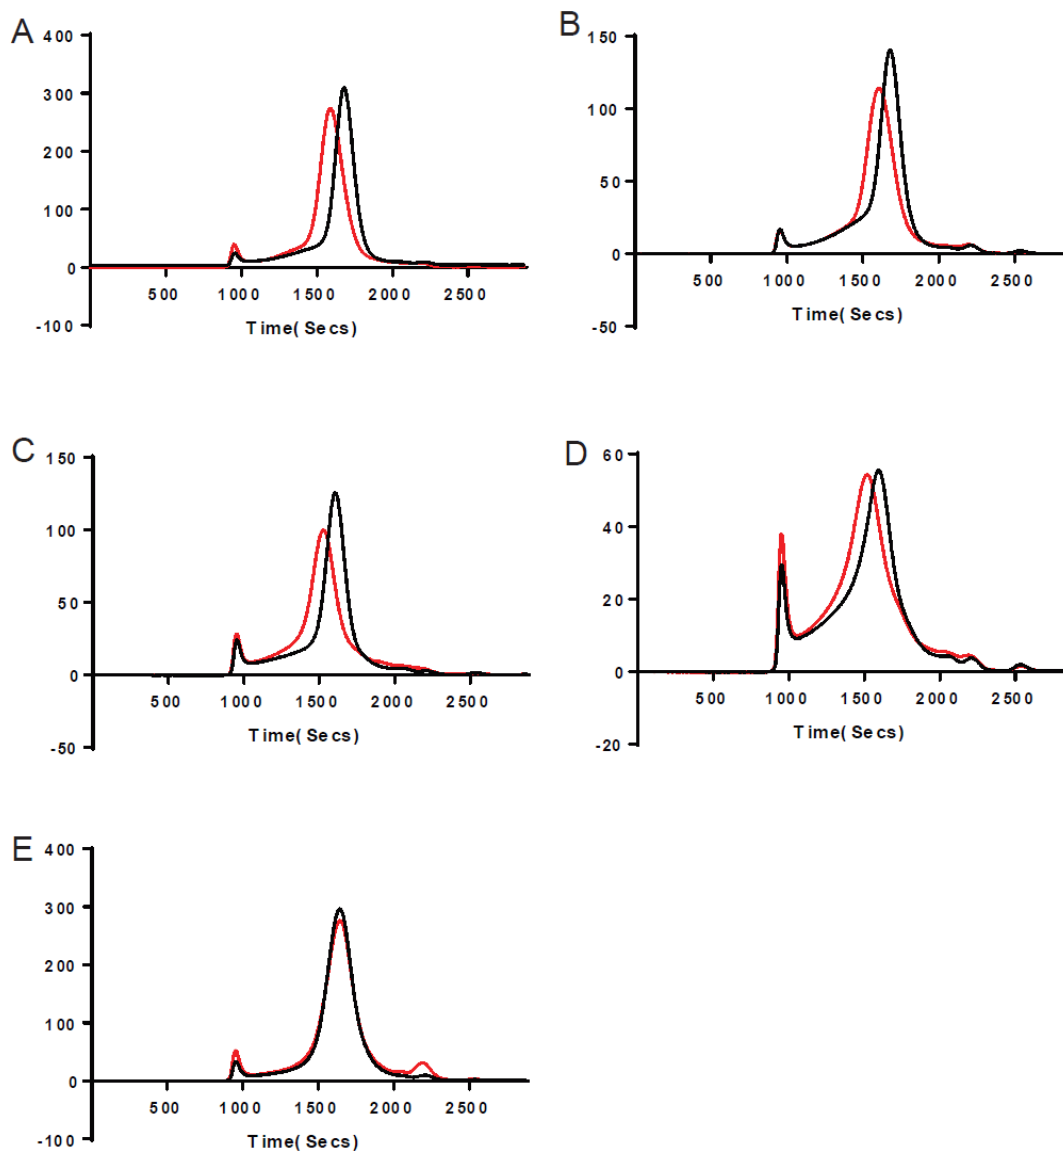

**Supplementary Figure 2.** Representative FSEC traces showing the subunit specificity of the 8E3 antibody. Cells expressing various subunit combinations of subunits (a)  $\alpha 1\beta 1$ , (b)  $\alpha 1\beta 1\gamma 2S$ , (c)  $\alpha 1\beta 2$ , (d)  $\alpha 1\beta 2 \gamma 2S$ , and (e)  $\alpha 6\beta 2\gamma 2S$  were solubilized and analyzed by fluorescence-detection-size-exclusion chromatography (FSEC) either alone (black trace) or with 8E3 Fab (red trace). Shifts in FSEC traces confirm that the presence of the  $\alpha 1$  subunit is required for 8E3 binding.



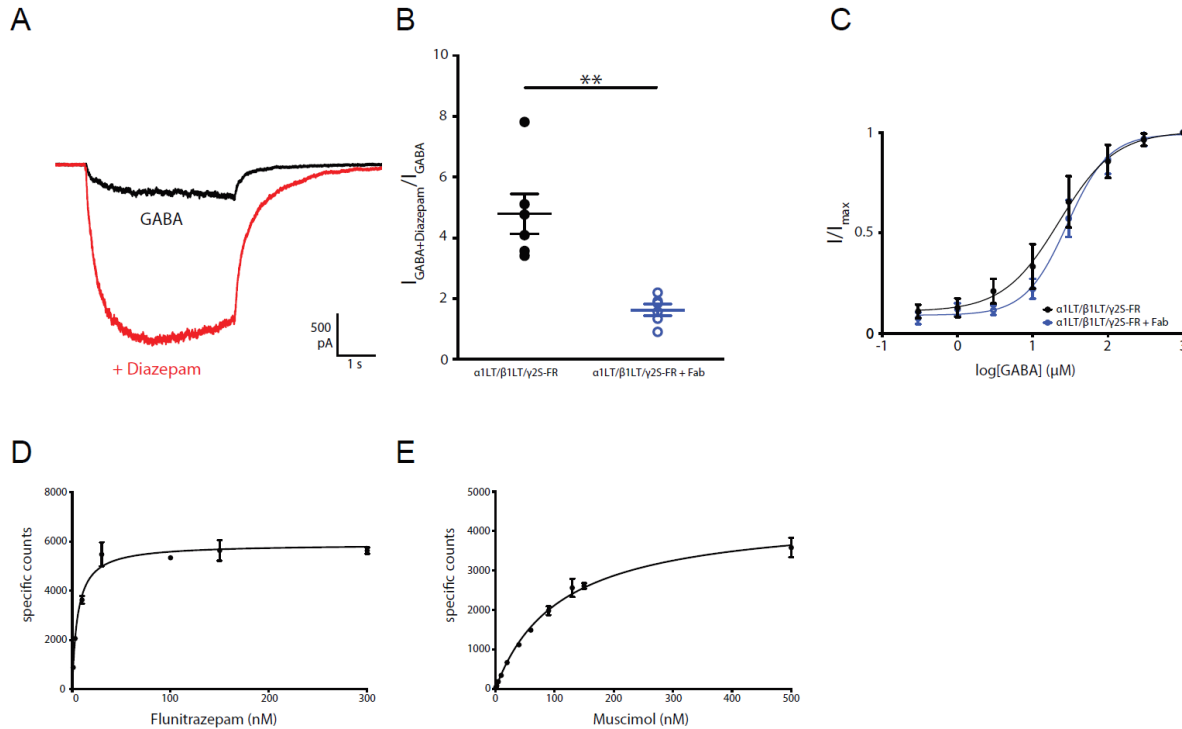

**Supplementary Figure 3.** Analysis of  $\alpha 1\beta 1\gamma 2_{EM}$  receptor function. (a) Representative whole-cell patch-clamp recording from TSA-201 cells expressing  $\alpha 1\beta 1_{EM}/\gamma 2S$ -FR receptors activated by 5  $\mu$ M GABA in the presence or absence of 1  $\mu$ M Diazepam. (b) Summary of electrophysiology data representing potentiation by 1  $\mu$ M Diazepam in the presence or absence of 25 nM Fab; n = 6 cells for both experiments. Unpaired t-test with Welch's correction, p = 0.0040 and 95% confidence interval (CI) = -4.861 to -1.466. Midline and error bars represent mean and SEM, respectively. (c) Dose-response data for GABA from TSA-201 cells expressing  $\alpha 1\beta 1_{EM}/\gamma 2S$ -FR receptors. EC<sub>50</sub> = 28.68  $\mu$ M (95% CI = 21.38-38.49  $\mu$ M) or 22.51  $\mu$ M (95% CI = 12.69-39.93  $\mu$ M) GABA in the presence or absence of 25 nM Fab, respectively. Error bars represent SEM and n = 6 cells for both experiments. (d) and (e), Saturation binding curve of [ $^3$ H]muscimol (d) and [Methyl- $^3$ H] flunitrazepam (e) to  $\alpha 1\beta 1\gamma 2_{EM}$  receptor Fab complexes; the plotted result is from a representative experiment. K<sub>d</sub> = 109.3 nM (95% CI = 91.76-129.7 nM) or 5.49 nM

(95% CI = 4.25 - 7.05 nM) for [<sup>3</sup>H] Muscimol and [Methyl-<sup>3</sup>H] Flunitrazepam, respectively.

Error bars represent SEM.

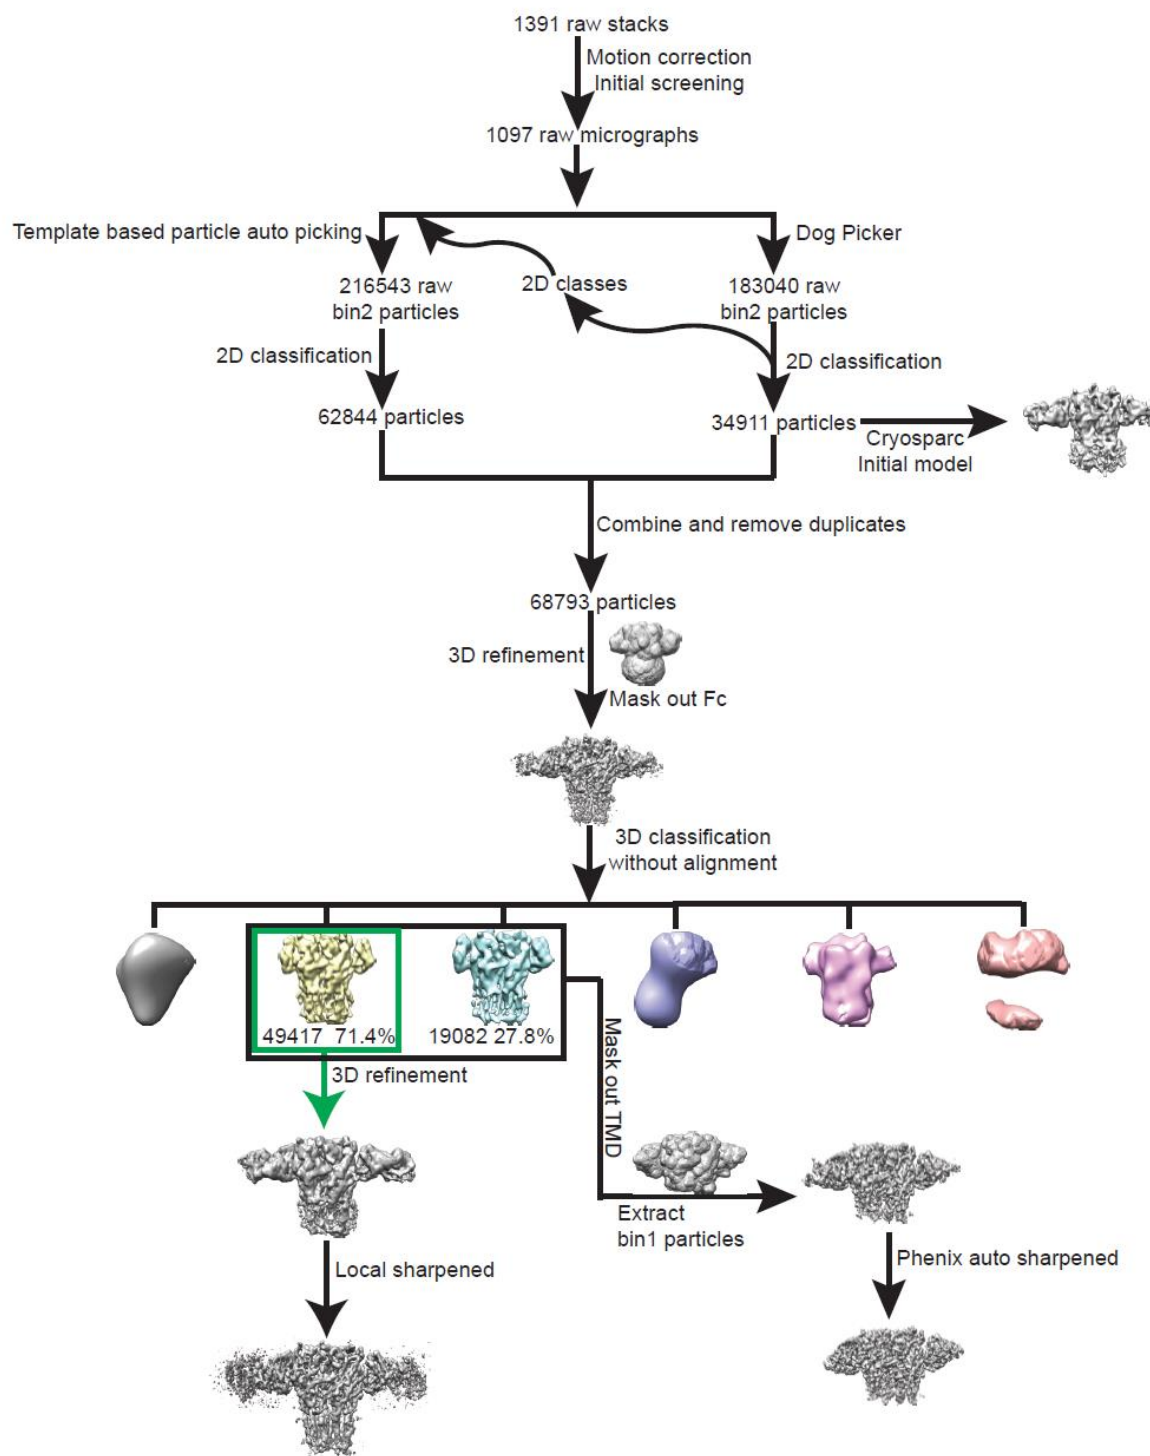

**Supplementary Figure 4.** The processing workflow of cryo-EM data analysis of triheteromeric GABA<sub>A</sub> receptor data set.

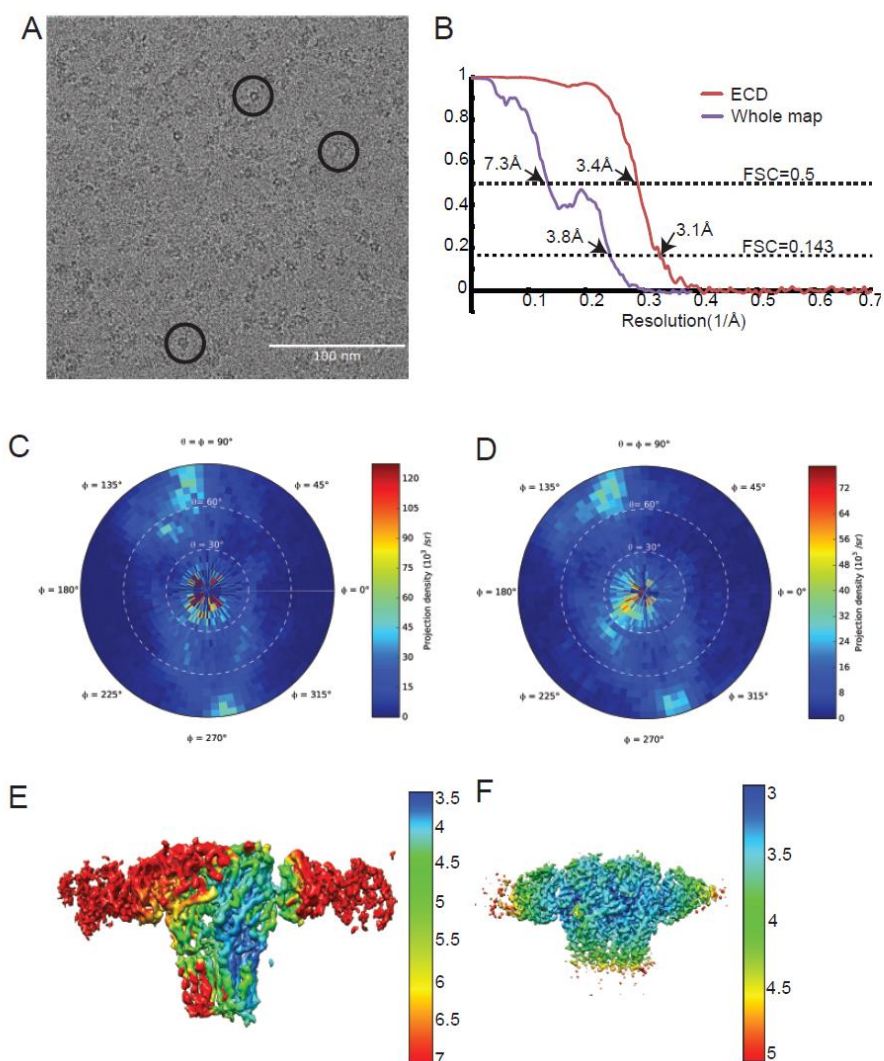

**Supplementary Figure 5.** Cryo-EM analysis of the triheteromeric data set. (a) Typical micrograph of triheteromeric GABA<sub>A</sub> receptor. (b) FSC curves for the whole map and ECD map. The resolution is determined using the gold standard FSC standard. FSC 0.5 is also labeled. Purple and red curves represent whole map and ECD map curve, respectively. The resolution for the whole map and the ECD map is 3.8 Å and 3.1 Å, respectively. (c) and (d) The particle angular distribution for the whole map and the ECD map, respectively. (e) and (f) The local resolution map for the whole map and the ECD map, respectively.

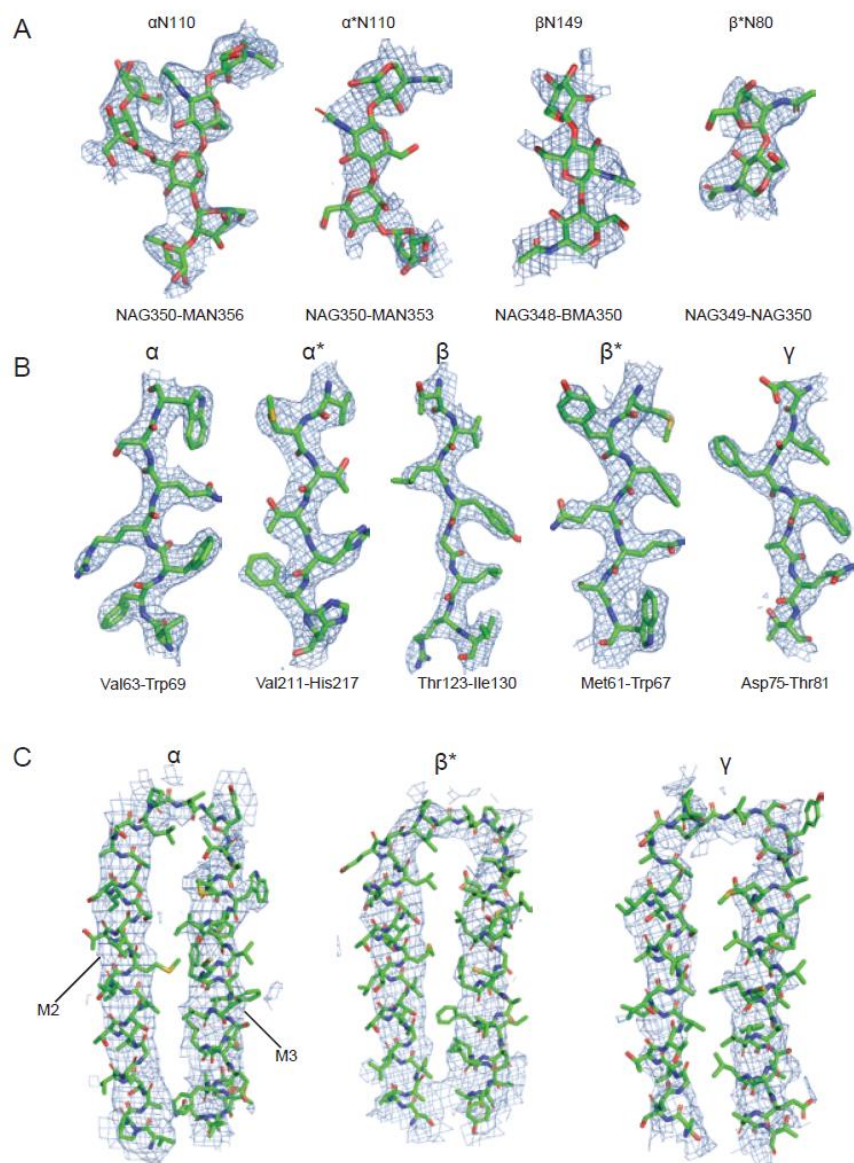

**Supplementary Figure 6.** Representative densities for the cryo-EM map of the triheteromeric GABA<sub>A</sub> receptor. (a) Glycosylation density located on  $\alpha$  and  $\alpha^*$  subunits sitting in the channel of the receptor are shown. The glycosylation densities at the outside of the receptor located on the  $\beta$  and  $\beta^*$  subunits are shown. These densities are from the ECD map. (b) The representative densities for  $\alpha$ ,  $\beta$  and  $\gamma$  subunits, from the ECD map. (c) TM3 and TM4 densities for the  $\alpha$ ,  $\beta$  and  $\gamma$  subunits are isolated from the whole map.

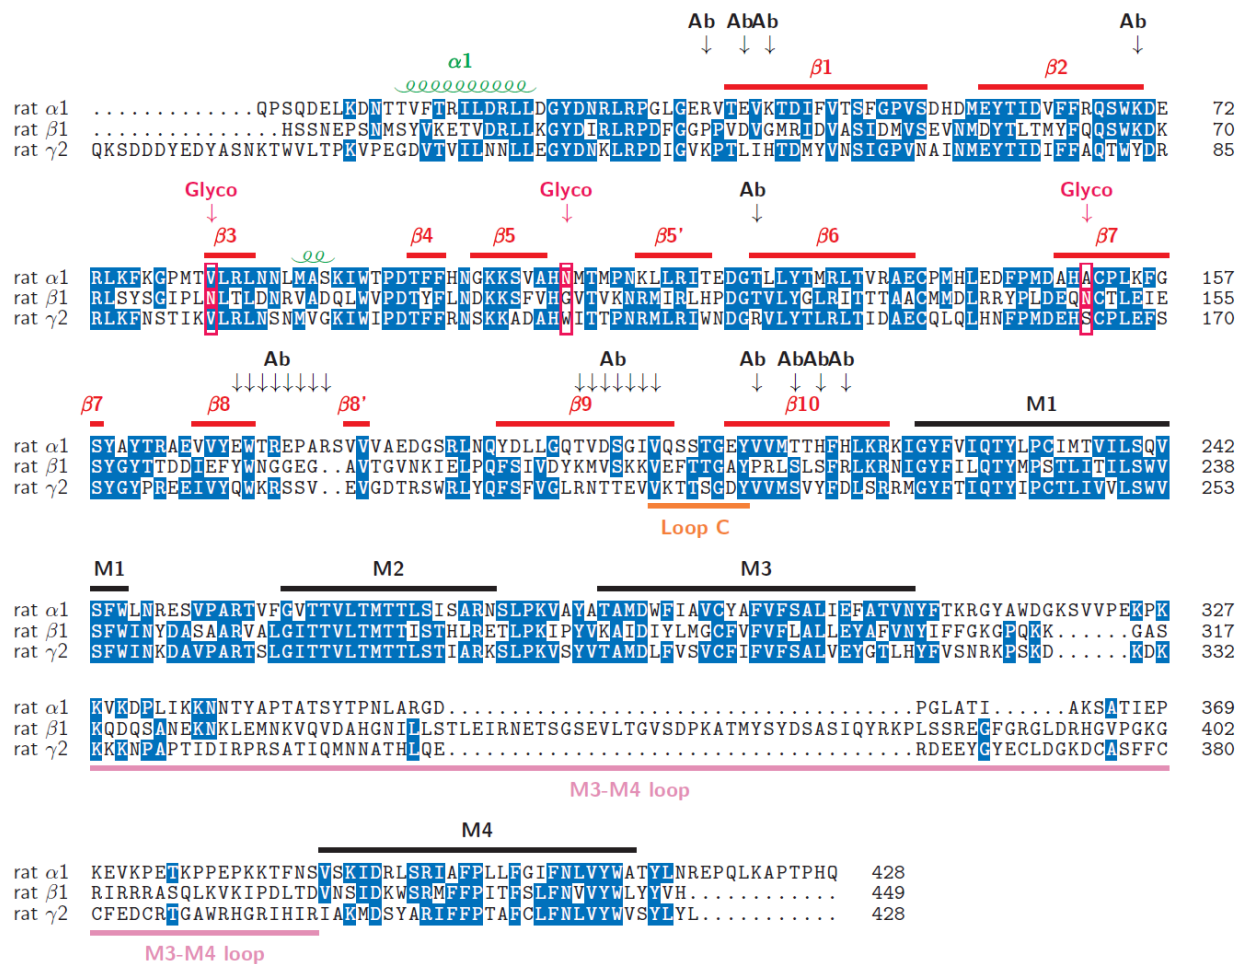

**Supplementary Figure 7.** Sequence alignment of the  $\alpha 1$ ,  $\beta 1$ ,  $\gamma 2$  sequence with secondary structure assignment marked. The glycosylation sites are marked with a red arrow, the corresponding position is boxed and the glycosylated residue is shown in a red background; the antibody binding sites are indicated with a black arrow and represent antibody binding in the  $\alpha$  subunit. Numbering for the  $\alpha 1$ ,  $\beta 1$ ,  $\gamma 2$  subunits is maintained as per the mature peptide.



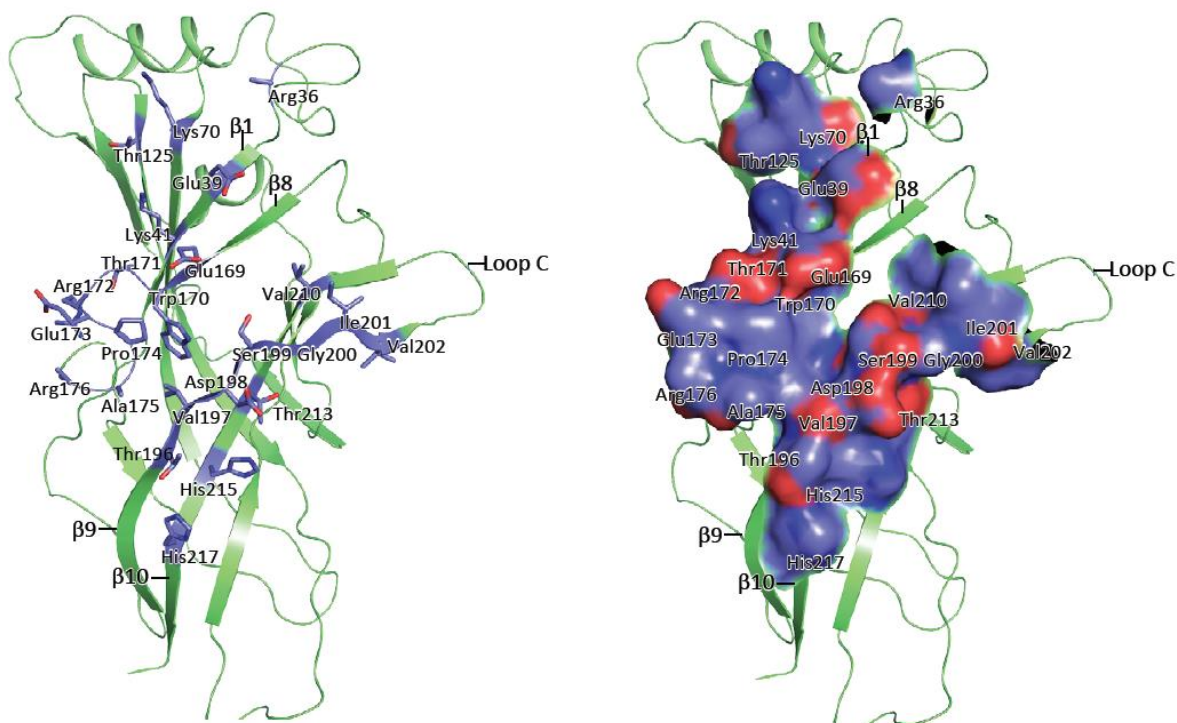

**Supplementary Figure 8.** 8E3 fab binding to the  $\alpha 1\beta 1\gamma 2_{EM}$  receptor. The 8E3 fab binds specifically on the  $\alpha$  subunit to residues located on the  $\beta$ -sheets 1, 8, 9 and 10. Analysis for the buried surface area was done by placing a model of Fab in the ECD electron density map and analyzing the resulting model on the PDBePISA web server. Interface residues are shown as sticks (a) and surface representation (b).

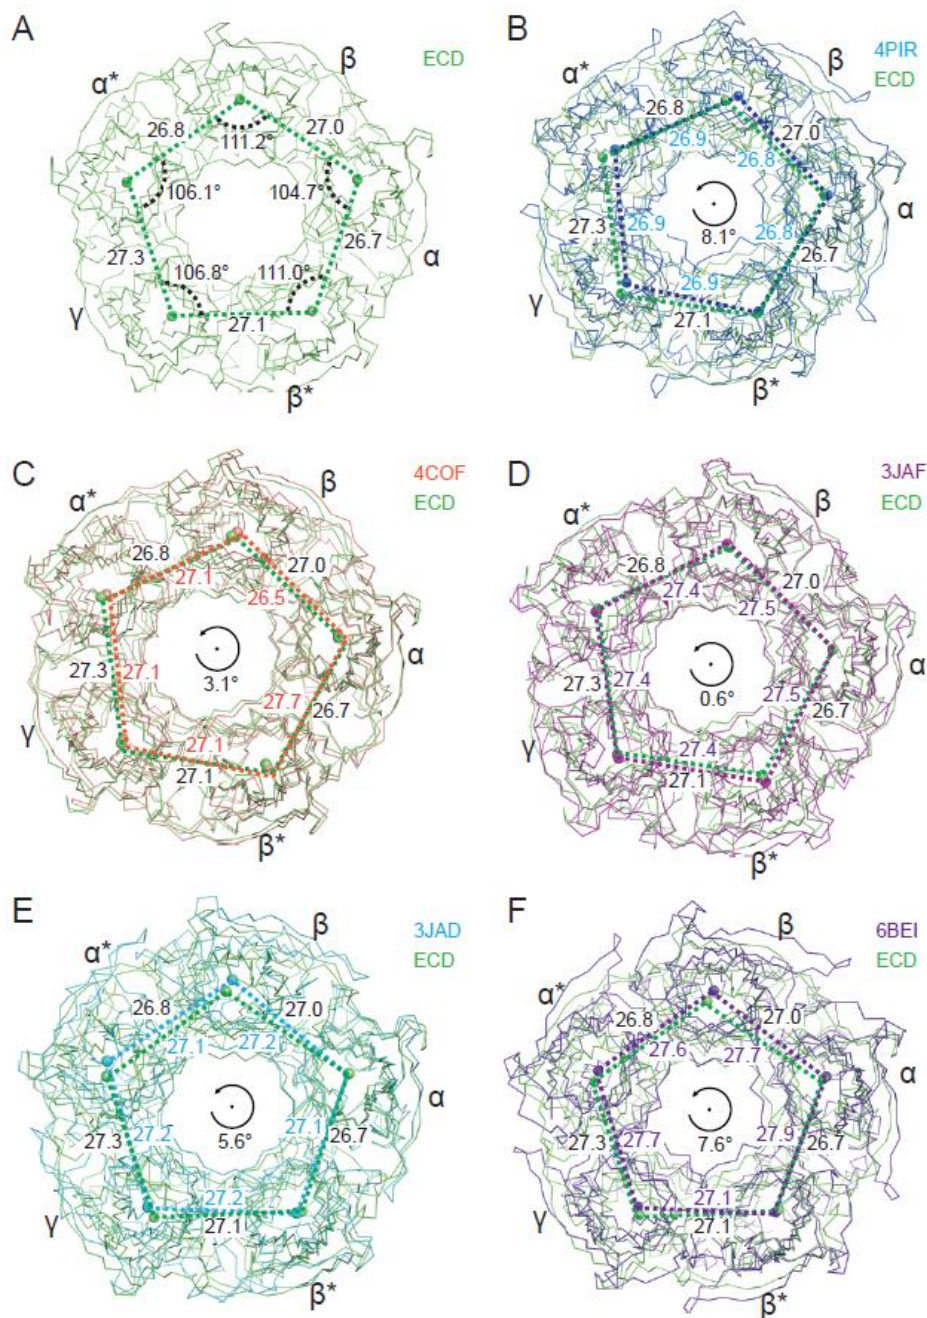

**Supplementary Figure 9.** Superposition of the triheteromeric GABA<sub>A</sub> receptor ECD structure with the 5-HT<sub>3A</sub> receptor structure (PDB code: 4PIR and 6BE1), the homo GABA<sub>A</sub>  $\beta$ 3 structure (PDB code: 4COF), the strychnine bound glycine receptor structure (PDB code: 3JAD), and the ivermectin-glycine bound glycine receptor structure (PDB



code: 3JAF). The Ca traces from chain A are used to do the alignment. (a) The distances between the nearby centers of mass, together with the angles of the pentagon of centers of mass, are shown. (b) The ECD structure is in lime and 4PIR is in marine. Lime and marine balls indicate the centers of mass of one subunit for the ECD structure and 4PIR, respectively. The distances between the two nearby centers of mass are labeled. The distances related to the ECD are labeled outside of the pentagon and the distances labeled inside the pentagon are for 4PIR. The angle indicates the approximate rotation of the pentagon formed by the five centers of mass between the ECD and 4PIR. (c), (d), (e) and (f) Similar to (a), the distances between the nearby two centers of mass are shown overlapping with the ECD structure.

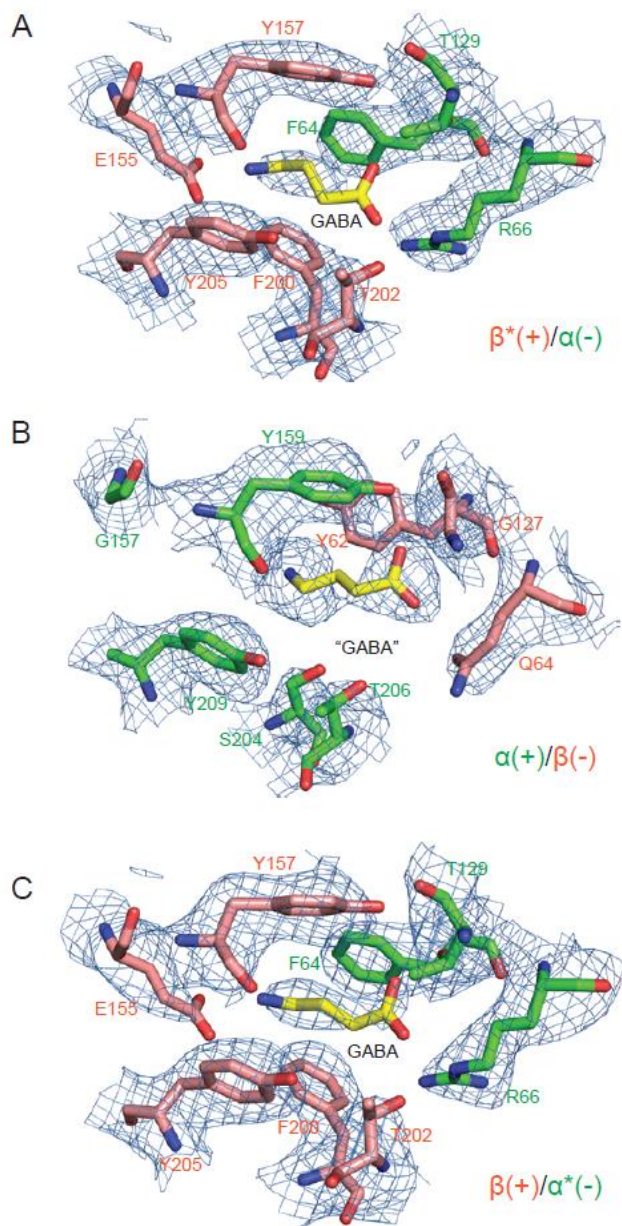

**Supplementary Figure 10.** Densities surrounding the GABA binding pocket. Three extra densities were found between the interfaces of subunits, (a) for the  $\beta^*(+)/\alpha(-)$  interface, (b) for the  $\alpha(+)/\beta(-)$  interface and (c) for the  $\beta(+)/\alpha^*(-)$ . GABA molecules were placed in these densities colored with yellow bonds, blue nitrogen and red oxygen. Due to the weak densities, it was hard to determine the exact positions of the GABA molecules.

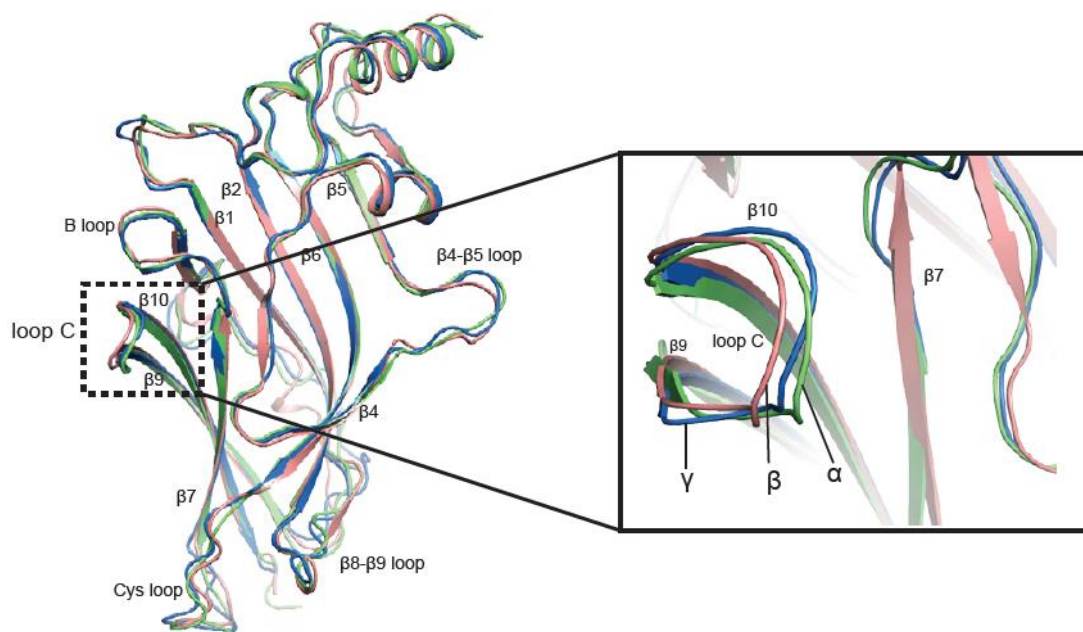

**Supplementary Figure 11.** Superimposition of the ECD between  $\alpha$ ,  $\beta^*$  and  $\gamma$  subunits.  $\alpha$ ,  $\beta$  and  $\gamma$  subunits are colored in salmon, lime and marine, respectively. The ligand binding site is indicated with a black dash frame.

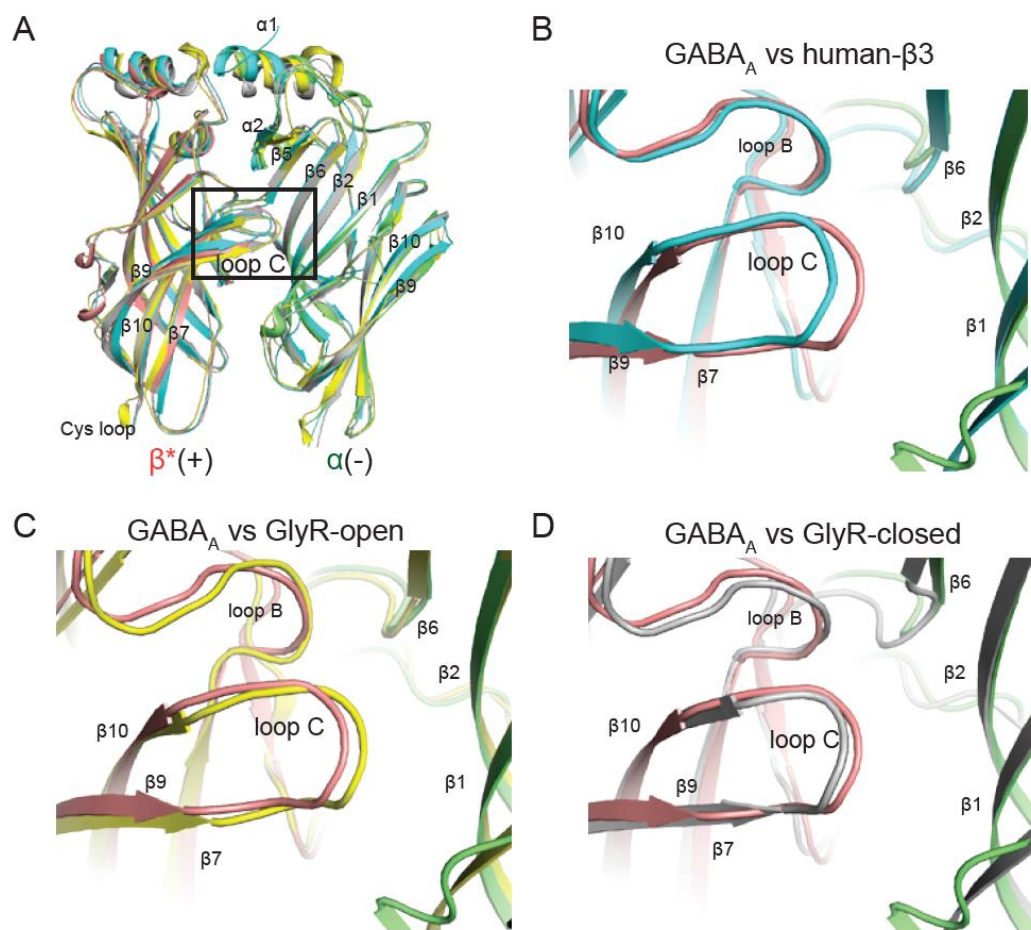

**Supplementary Figure 12.** Superposition of the ECD of  $\beta^*/\alpha$  subunits with the structure for human  $\beta_3$  GABA<sub>A</sub> (PDB code: 4COF), GlyR-open (PDB code: 3JAE) and GlyR-closed (PDB code: 3JAD) to illustrate the configuration of loop C in each structure. (a) Overall comparison of ECD of  $\beta^*/\alpha$  subunits with the human  $\beta_3$  GABA<sub>A</sub>, GlyR-open and GlyR-closed.  $\beta^*(+)$  and  $\alpha(-)$  are colored in salmon and lime. Human- $\beta_3$ , GlyR-open and GlyR-closed are colored in cyan, yellow and gray, respectively. Loop C was highlighted with a black frame. The enlarged view in the loop C was shown in (b), (c) and (d).

|          |     | <u>β4</u> | <u>β5</u> | <u>β5'</u>    | <u>β6</u>    |                            |
|----------|-----|-----------|-----------|---------------|--------------|----------------------------|
| GABA_α1  | 119 | SK        | WTP       | DTFFHNGKKSVAH | NMTMPNKLLRIT | EDGTLLEYT                  |
| GABA_α2  | 119 | SK        | WTP       | DTFFHNGKKSVAH | NMTMPNKLLRI  | QDDGTLLEYT                 |
| GABA_α3  | 144 | SK        | WTP       | DTFFHNGKKSVAH | NMTTPNKLLRL  | VDNGTLLEYT                 |
| GABA_α4  | 125 | TK        | WTP       | DTFFRNGKKS    | SVSHNMTAPNK  | LFRIMRNGTILYT              |
| GABA_α5  | 126 | SK        | WTP       | DTFFHNGKKS    | IAHNMTTPNK   | LLRLEDDGTLLEYT             |
| GABA_α6  | 109 | SK        | WTP       | DTFFRNGKKS    | IAHNMTTPNK   | LFRIMQNGTILYT              |
| GABA_β1  | 114 | DQ        | WVP       | DTYFLNDKKS    | FVHGVTVKNR   | MIRLHPDGTVLYG              |
| GABA_β2  | 113 | DQ        | WVP       | DTYFLNDKKS    | FVHGVTVKNR   | MIRLHPDGTVLYG              |
| GABA_β3  | 114 | DQ        | WVP       | DTYFLNDKKS    | FVHGVTVKNR   | MIRLHPDGTVLYG              |
| GABA_γ1  | 141 | GK        | WIP       | DTFFRNSRKS    | DAHWITTPN    | RLRIWNDGRVLYT              |
| GABA_γ2  | 143 | GK        | WIP       | DTFFRNSRKS    | KADAHWITTP   | NRLRIWNDGRVLYT             |
| GABA_γ3  | 124 | GL        | WIP       | DTIFRNSK      | TAEAHWITTP   | NQLLRIWNDGKILYT            |
| GABA_δ   | 117 | DK        | WLP       | DTFIVNAK      | SAWFHDVTV    | ENKLRQLPDGVILYS            |
| GABA_ε   | 148 | SQ        | WIP       | DTFFRNSKR     | THEHEITMP    | NQMVRIYKDGKVLTY            |
| GABA_θ   | 136 | EK        | WVP       | DCYFLNSK      | DAFVHDVTV    | ENRVFQLHPDGTVRYG           |
| GABA_π   | 113 | EF        | WVP       | DTYIVESK      | SFLHEVTVGN   | RIRLFSNGTVLYA              |
| GABA_ρ1  | 151 | KK        | WVP       | DMFFVHSK      | RSFIHDTT     | TDNVMLRVQPDGKVLYS          |
| GABA_ρ2  | 131 | KK        | WVP       | DVFFVHSK      | RSFTHDTT     | DNIMLRVFPDGHVLYS           |
| GABA_ρ3  | 137 | RK        | WVP       | DIFVHSK       | RSFIHDTT     | MENIMLRVHPDGNVLLS          |
| GlyR_α1  | 119 | DS        | WKP       | DLFFANEK      | GAFHEITTD    | NKLLRISRNGNVLYS            |
| GlyR_α2  | 125 | DS        | WKP       | DLFFANEK      | GAFHFDVTT    | NKLLRISKNGKVLYS            |
| GlyR_α3  | 124 | DS        | WKP       | DLFFANEK      | GAFHEVTTD    | NKLLRIFKNGNVLYS            |
| GlyR_β   | 136 | KC        | WKP       | DLFFANEK      | SANFHDVTQ    | ENILLFIFRDGDVLVS           |
| 5HT3A    | 113 | DS        | WVP       | DILINEFV      | DVGKSPNIP    | Y-VYIRH--QGEVQNY           |
| 5HT3B    | 111 | SA        | WAP       | DIINEFV       | DIERYPDL     | PY-VYVNS--SGTIENY          |
| 5HT3C    | 118 | EN        | WLP       | DIFIVESM      | DVDQTPSGL    | T-AYISS--EGRIKYD           |
| 5HT3D    | 115 | EN        | WLS       | DVFIEES       | --VDQTPAG    | LM-ASMS-----               |
| 5HT3E    | 118 | KN        | WLP       | DIFIIELM      | DVDKTPKGL    | T-AYVSN--EGRIRYK           |
| ACHA_α1  | 128 | EK        | WRP       | DVLVYNN       | ADGDFAI      | VKFTKVLQY--TGHITWT         |
| ACHA_α2  | 138 | EM        | WIP       | DIVLYNN       | ADGEFAV      | THMTKAHLFS--TGTVHVW        |
| ACHA_α3  | 114 | QK        | WKP       | DIVLYNN       | AVGDFQV      | DDKTKALLKY--TGEVTWI        |
| ACHA_α4  | 116 | EL        | WRP       | DIVLYNN       | ADGDFAV      | THLTKAHLFH--DGRVQWT        |
| ACHA5_α5 | 126 | DS        | WTP       | DIVLFDN       | ADGRFEG      | TSTKTIVIRY---NGTVTWT       |
| ACHA_α6  | 113 | DK        | WKP       | DIVLYNN       | AVGDFQV      | EGTKALLKY--NGMITWT         |
| ACHA_α7  | 105 | GQ        | WKP       | DILLYNS       | ADERF        | DATFHTNVLVNS--SGHCQYL      |
| ACHA_α9  | 110 | DL        | WRP       | DIVLYNK       | ADDESSE      | PVNTNVVLRV--DGLITWD        |
| ACHA_α10 | 109 | SL        | WRP       | DIVLYNK       | ADAQPPG      | SASTNVVLRH--DGAVRWD        |
| ACHB_β1  | 106 | ES        | WLP       | DVLLNND       | GNFDVAL      | DISVVVSS--DGSVRWQ          |
| ACHB_β2  | 110 | KH        | WLP       | DVLYNN        | ADGM         | YEVSYFYSNAVVSY--DGSIFWL    |
| ACHB_β3  | 108 | ES        | WLP       | DIVLFEN       | ADGRFEG      | SLMTKVIVKS--NGTVVWT        |
| ACHB_β4  | 108 | KR        | WLP       | DIVLYNN       | ADGTYE       | VSVTNLIVRS--NGSVLWL        |
| ACHG_γ   | 105 | TM        | WRP       | DIVLENN       | V            | DGVFEVALYCNVLSVSP--DGCIYWL |
| ACHD_δ   | 106 | DM        | WLP       | DIVLENN       | DGSFQ        | ISYSCNVLVYH-YGFVYWL        |

**Supplementary Figure 13.** Sequence alignment of the human Cys-loop receptors.

Sequences were downloaded from swiss-prot with the following identifiers: P14867, P47869, P34903, P48169, P31644, Q16445, P18505, P47870, P28472, Q8N1C3,

P18507, Q99928, O14764, P78334, Q9UN88, O00591, P24046, P28476, A8MPY1, P23415, P23416, O75311, P48167, P46098, O95264, Q8WXA8, Q70Z44, A5X5Y0, P02708, Q15822, P32297, P43681, P30532, Q15825, P36544, Q9UGM1, Q9GZZ6, P11230, P17787, Q05901, P30926, P07510, Q07001. Fully conserved positions are shaded as black and partially conserved positions are shaded gray. Numbering shown is based on the swiss-prot record and represents the numbering for the nascent peptide. The unique  $\alpha$  specific glycosylation site is colored in Red.



**Supplementary Table 1** Statistics of data collection, 3D reconstruction and model

| Ligands                                   | GABA        |       |
|-------------------------------------------|-------------|-------|
| <b>Data collection</b>                    | Whole map   | ECD   |
| <b>processing</b>                         |             |       |
| Microscope                                | Titan Krios |       |
| Voltage(kV)                               | 300         |       |
| Defocus range ( $\mu\text{m}$ )           | 1.2-2.5     |       |
| Exposure time (s)                         | 40s         |       |
| Camera                                    | Falcon3     |       |
| Dose rate ( $e^-/\text{\AA}^2/\text{s}$ ) | 0.6         |       |
| Number of frames                          | 200         |       |
| Pixel size ( $\text{\AA}$ )               | 0.649       |       |
| Particles processed                       | 216543      |       |
| Particles refined                         | 49147       | 68229 |
| Resolution ( $\text{\AA}$ ) <sup>\$</sup> | 3.8         | 3.1   |
| <b>Model Statistics</b>                   |             |       |
| Number of atoms                           | 12837       |       |
| Protein                                   | 12813       |       |
| Ligand                                    | 24          |       |
| r.m.s. deviations                         |             |       |
| Bond length ( $\text{\AA}$ )              | 0.004       | 0.005 |
| Bond angle ( $^\circ$ )                   | 0.876       | 0.899 |
| Ramachandran plot                         |             |       |
| Favored (%)                               | 94.28       | 94.31 |
| Allowed (%)                               | 5.72        | 5.69  |
| Disallowed (%)                            | 0.00        | 0.00  |

<sup>\$</sup> indicates the resolution reported by Relion without postprocessing.

**Supplementary Table 2** Statistics of solvent accessible surface area

| <b>Interface Area(Å<sup>2</sup>)</b> | <b><math>\alpha\beta</math></b> | <b><math>\beta\alpha^*</math></b> | <b><math>\alpha^*\gamma</math></b> | <b><math>\gamma\beta^*</math></b> | <b><math>\beta^*\alpha</math></b> |
|--------------------------------------|---------------------------------|-----------------------------------|------------------------------------|-----------------------------------|-----------------------------------|
| <b>S<sub>+</sub></b>                 | 12795                           | 12290                             | 12318                              | 11892                             | 12291                             |
| <b>S<sub>-</sub></b>                 | 12290                           | 12318                             | 11892                              | 12291                             | 12795                             |
| <b>S<sub>T</sub></b>                 | 21917                           | 21669                             | 21898                              | 21539                             | 21885                             |
| <b>S<sub>interface</sub></b>         | 1584                            | 1470                              | 1156                               | 1322                              | 1601                              |

Note: The solvent accessible surface area is measured using the script get\_area in Pymol. The transmembrane helices were deleted before measuring the solvent accessible surface area. S<sub>+</sub> stands for the surface area of the isolated subunit at (+) side, S<sub>-</sub> for the isolated subunit at (-) side, S<sub>T</sub> for isolated dimer and S<sub>interface</sub> for the interface between two subunits. The S<sub>interface</sub> is finally calculated by (S<sub>+</sub>+ S<sub>-</sub>-S<sub>T</sub>)/2.
